1 **New and improved GRAB fluorescent sensors for monitoring dopaminergic activity *in vivo***

2

3 **Running title: Next-generation GRAB sensors for monitoring dopaminergic activity**

4

5 Fangmiao Sun<sup>1,2,7</sup>, Jingheng Zhou<sup>5,7</sup>, Bing Dai<sup>6,7</sup>, Tongrui Qian<sup>1,2</sup>, Jianzhi Zeng<sup>1,2,3</sup>, Xuelin Li<sup>1,2</sup>,  
6 Yizhou Zhuo<sup>1,2,3</sup>, Yajun Zhang<sup>1,2,3</sup>, Ke Tan<sup>1,2</sup>, Jiesi Feng<sup>1,2,3</sup>, Hui Dong<sup>1,2</sup>, Cheng Qian<sup>1,2,4</sup>, Dayu  
7 Lin<sup>6\*</sup>, Guohong Cui<sup>5\*</sup>, Yulong Li<sup>1,2,3\*</sup>

8

9 <sup>1</sup>State Key Laboratory of Membrane Biology, Peking University School of Life Sciences, 100871  
10 Beijing, China.

11 <sup>2</sup>PKU-IDG/McGovern Institute for Brain Research, 100871 Beijing, China.

12 <sup>3</sup>Peking-Tsinghua Center for Life Sciences, 100871 Beijing, China.

13 <sup>4</sup>School of Life Sciences, Tsinghua University, Beijing 100084, China.

14 <sup>5</sup>Neurobiology Laboratory, National Institute of Environmental Health Sciences, National Institutes  
15 of Health, Research Triangle Park, NC 27709, USA.

16 <sup>6</sup>Neuroscience Institute, Department of Psychiatry, New York University School of Medicine, New  
17 York, NY 10016, USA.

18 <sup>7</sup>These authors contributed equally.

19 \*e-mail: Dayu.Lin@nyulangone.org; cuig@mail.nih.gov; yulongli@pku.edu.cn.

20

21 **The monoamine neuromodulator dopamine (DA) plays a critical role in the brain, and the**  
22 **ability to directly measure dopaminergic activity is essential for understanding its**  
23 **physiological functions. We therefore developed the first red fluorescent GPCR-activation–**  
24 **based DA (GRAB<sub>DA</sub>) sensors and optimized versions of green fluorescent GRAB<sub>DA</sub> sensors**  
25 **following our previous studies. In response to extracellular DA, both the red and green**  
26 **GRAB<sub>DA</sub> sensors have a large increase in fluorescence ( $\Delta F/F_0$  values of 150% and 340%,**  
27 **respectively), with subcellular resolution, subsecond kinetics, and nanomolar to**  
28 **submicromolar affinity. Moreover, both the red and green GRAB<sub>DA</sub> sensors readily resolve**  
29 **evoked DA release in mouse brain slices, detect compartmental DA release in live flies with**  
30 **single-cell resolution, and report optogenetically elicited nigrostriatal DA release as well as**  
31 **mesoaccumbens dopaminergic activity during sexual behavior in freely behaving mice.**  
32 **Importantly, co-expressing red GRAB<sub>DA</sub> with either green GRAB<sub>DA</sub> or the calcium indicator**  
33 **GCaMP6s provides a robust tool for simultaneously tracking neuronal activity and**  
34 **dopaminergic signaling in distinct circuits *in vivo*.**

35

36 Dopamine (DA) is an essential monoamine neuromodulator produced primarily in the midbrain and  
37 released throughout the central nervous system. A multitude of brain functions are regulated by DA,  
38 including motor control, motivation, learning and memory, and emotional control<sup>1-9</sup>. Consistent with  
39 these key physiological roles, altered DA signaling has been implicated in a variety of brain  
40 disorders, including Parkinson's disease, addiction, schizophrenia, attention-deficit/hyperactivity  
41 disorder, and posttraumatic stress disorder<sup>10-20</sup>. Thus, tools that can sense changes in DA  
42 concentration with high spatiotemporal resolution, high specificity, and high sensitivity will greatly  
43 facilitate our study of the diverse functions that the dopaminergic system plays under both  
44 physiological and pathological conditions.

45 Previous techniques for measuring DA dynamics, including microdialysis, electrochemical  
46 probes, reporter cells, and gene expression–based assays, lack sufficient spatiotemporal resolution  
47 and/or molecular specificity<sup>21–30</sup>. Recently, our group<sup>31</sup> and Patriarchi et al.<sup>32</sup> independently  
48 developed two series of genetically encoded, G-protein–coupled receptor (GPCR)–based DA  
49 sensors called GRAB<sub>DA</sub> and dLight, respectively. Taking advantage of naturally occurring DA  
50 receptors, these sensors convert a ligand–stabilized conformational change in the DA receptor into  
51 an optical response via a conformation-sensitive fluorescent protein inserted in the receptor’s third  
52 intracellular loop. Our first-generation DA receptor–based sensors called GRAB<sub>DA1m</sub> and  
53 GRAB<sub>DA1h</sub> were used to detect cell type–specific DA dynamics in several organisms, including  
54 *Drosophila*, zebrafish, mice, and zebra finches<sup>31,33–35</sup>. Here, we employed semi-rational engineering  
55 to modify the green fluorescent protein. The resulted second-generation sensors called GRAB<sub>DA2m</sub>  
56 and GRAB<sub>DA2h</sub> (abbreviated DA2m and DA2h, respectively) have a 2–3-fold higher dynamic range  
57 and improved *in vivo* performance in comparison to their corresponding first-generation sensors.

58 Red fluorescent sensors have distinct and well-separated spectra from those of GFP–based sensors  
59 and blue light–excitable channelrhodopsin 2 (ChR2), thus enabling the orthogonal readout of two  
60 neurochemical events or simultaneous monitoring blue light–mediated activity control. Moreover,  
61 red fluorescent sensors require an excitation light with a relatively longer wavelength, providing  
62 additional advantages over green fluorescent proteins, including reduced phototoxicity, reduced  
63 background, and deeper tissue penetration<sup>36,37</sup>. Starting with the dopamine D2 receptor (D<sub>2</sub>R) and a  
64 conformation-sensitive red fluorescent protein cpmApple<sup>38</sup>, we generated a series of red fluorescent  
65 DA sensors called rGRAB<sub>DA1m</sub> and rGRAB<sub>DA1h</sub> (abbreviated rDA1m and rDA1h, respectively),  
66 with a dynamic range similar to the corresponding first-generation green DA sensors.

67 Here, we report the development, *in vitro* characterization, and *in vivo* application of our novel  
68 red fluorescent DA sensors and second-generation green fluorescent DA sensors for monitoring DA  
69 dynamics in real-time in *Drosophila* and mice in response to physiologically relevant stimuli and  
70 during complex behaviors.

71

## 72 Results

73 **Development and *in vitro* characterization of DA sensors.** To develop red fluorescent DA sensors,  
74 we systematically optimized the cpmApple insertion sites within the third intracellular loop of D<sub>2</sub>R,  
75 the linker sequences, and the cpmApple module itself, using both brightness and DA–induced  
76 change in fluorescence ( $\Delta F/F_0$ ) as our selection criteria. Screening a library containing over 2000  
77 sensor variants revealed the sensor with the highest fluorescence response; we called this sensor  
78 rDA0.5. Next, we used a rational strategy to introduce an iterative series of mutations in the D<sub>2</sub>R  
79 module of rDA0.5, generating versions with differing apparent affinities to DA. The medium-  
80 affinity sensor rDA1m was generated by introducing the K367<sup>6.29</sup>L mutation in the receptor, and the  
81 high-affinity sensor rDA1h was generated by introducing the T205<sup>5.54</sup>M mutation in rDA1m. Finally  
82 a DA–insensitive version (rDA-mut) was generated by introducing the C118<sup>3.36</sup>A and S193<sup>5.42</sup>N  
83 mutations in rDA1h (Fig. 1a,b,d and Supplementary Fig. S1b,c). All three versions localized nicely  
84 on the cell membrane when expressed in HEK293T cells (Fig. 1c). rDA1m and rDA1h had an EC<sub>50</sub>  
85 of 95 nM and 4 nM, respectively (Fig. 1d). Moreover, the application of 100  $\mu$ M DA elicited a 150%  
86 and 100% increase in fluorescence of rDA1m and rDA1h, respectively, which was blocked by the  
87 D<sub>2</sub>R antagonist haloperidol (Halo) (Fig. 1c,d). As expected, DA had no effect in cells expressing  
88 rDA-mut, even at the highest concentration tested (Fig. 1c,d).

89 Next, we asked whether the red DA sensors undergo photoactivation when expressed in  
90 HEK293T cells and cultured neurons. Previous studies showed that cpmApple-based sensors can  
91 undergo photoactivation when illuminated with blue light<sup>39-41</sup>, preventing the combined use of these  
92 sensors with ChR2. We found that although cpmApple-based red fluorescent calcium indicator  
93 jRGECO1a<sup>41</sup> had a 20% increase in fluorescence upon blue light illumination (Fig. 1e), blue light  
94 had no effect on the fluorescence of either rDA1m or rDA1h, suggesting that our red fluorescent  
95 DA sensors are compatible for use with blue light-mediated optogenetic activation. Moreover, we  
96 found that photostability of the red DA sensors was similar to or better than several commonly used  
97 red fluorescent proteins (Supplementary Fig. S1d).

98 In parallel, we optimized our first-generation green fluorescent DA sensors by performing  
99 random mutagenesis at 32 sites in the cpEGFP module (Fig. 1f). Screening ~1000 variants yielded  
100 DA2h, the second-generation high-affinity green fluorescent DA sensor (Fig. 1g and Supplementary  
101 Fig. S1a); this sensor was then used to generate the medium-affinity DA2m and DA-insensitive  
102 DA-mut versions (Fig. 1g). Compared to their corresponding first-generation DA1m and DA1h  
103 sensors, the second-generation green fluorescent DA sensors had a 2–3 fold higher fluorescence  
104 increase ( $\Delta F/F_0$  ~340% for DA2m and ~280% for DA2h) to 100  $\mu$ M DA while maintaining their  
105 apparent affinity to DA, with  $EC_{50}$  values of 90 nM and 7 nM for DA2m and DA2h, respectively  
106 (Fig. 1h,i). Finally, the DA-insensitive DA-mut sensor localized well on the cell membrane but did  
107 not respond to DA (Fig. 1h,i).

108 We further characterized the specificity, kinetics, and downstream coupling of our newly  
109 developed DA sensors. With respect to specificity, the DA-induced signals of both the red and green  
110 DA sensors were blocked by the D<sub>2</sub>R-specific antagonists Halo and eticlopride, but not the D<sub>1</sub>R  
111 antagonist SCH-23390. None of these four DA sensors responded to a variety of neurotransmitters  
112 and neuromodulators (Fig. 2a). We also found that although norepinephrine (NE) is structurally  
113 similar to DA, both the red and green DA sensors were 10–20 fold more selective for DA over NE  
114 (Fig. 2a, inset), suggesting the high selectivity of the sensors to DA at physiologically relevant  
115 concentrations<sup>42-45</sup>.

116 We next characterized the kinetics of the DA sensors using rapid line scanning in response to a  
117 local puff of DA (to measure  $\tau_{on}$ ) followed by Halo (to measure  $\tau_{off}$ ) to sensor-expressing HEK293T  
118 cells. As shown in Fig. 2b and 2c,  $\tau_{on}$  was <100 ms for all four DA sensors while the high-affinity  
119 versions of the red and green fluorescent sensors had relatively slower off kinetics compared to their  
120 corresponding medium-affinity counterparts.

121 To examine whether our DA sensors couple to downstream signaling pathways, we used the  
122 luciferase complementation assay<sup>46</sup> and TANGO assay<sup>47</sup> to measure activation of the Gi (Fig. 2d)  
123 and  $\beta$ -arrestin (Fig. 2e) pathways, respectively. When expressed in HEK293T cells, both the rDA1h  
124 and DA2h sensors had virtually no downstream coupling; as a control, the wild-type D<sub>2</sub>R showed  
125 robust coupling (Fig. 2d,e). In the cultured neurons, we also found that both the red and green DA  
126 sensors readily localized on the cell membrane and responded well to DA (Fig. 2f-i), supporting the  
127 utility of the sensors in the nervous system.

128 Lastly, we compared the properties of the second-generation green fluorescent DA2m sensor with  
129 D<sub>1</sub>R-based dLight1.1 and dLight 1.2 sensors (Supplementary Fig. S2a-j). When expressed in  
130 cultured cells, DA2m had a higher apparent affinity to DA, higher basal brightness, a higher  $\Delta F/F_0$   
131 response, and a higher signal-to-noise ratio (SNR) than dLight.

132 Taken together, these results indicate that our red and improved green fluorescent DA sensors are

133 highly sensitive and specific to DA, with rapid kinetics, suggesting that they will be suitable for  
134 monitoring dopaminergic activity *in vivo*.

135

136 **Imaging of DA release in acute mouse brain slices.** Next, we examined whether our DA sensors  
137 can be used to measure the release of endogenous DA in acute brain slices. We first injected AAVs  
138 expressing rDA1m, rDA1h, or DA2m into the nucleus accumbens (NAc), which receives strong  
139 innervation from midbrain dopaminergic neurons<sup>48-50</sup> (Fig. 3a,b). Two weeks after expressing the  
140 sensor, we prepared acute brain slices and used 2-photon imaging combined with electrical  
141 stimulation to measure stimulus-evoked DA release (Fig. 3a). Electrical stimuli delivered at 20 Hz  
142 induced progressively increased fluorescence responses in the NAc, which was blocked by Halo  
143 (Fig. 3c,e). We also measured the sensors' kinetics during 10 pulses applied at 100 Hz. The  $\tau_{\text{on}}$  and  
144  $\tau_{\text{off}}$  values are 0.08–0.15 s and 5.2–11.8 s, respectively (Fig. 3d).

145 To test whether the red fluorescent DA sensor is spectrally compatible with the green fluorescent  
146 calcium sensor, we co-expressed the axon-targeted GCaMP6s<sup>51</sup> in the ventral tegmental area (VTA)  
147 and rDA1m in the NAc, then simultaneously imaged calcium and DA in the NAc during 20 Hz  
148 electrical stimulation (Fig. 3f,g). We found that the electrical stimulation evoked robust fluorescence  
149 increase of both GCaMP6s and rDA1m and their magnitudes of increases were highly correlated  
150 (Fig. 3k). Application of the D<sub>2</sub>R antagonist Halo blocked the rDA1m response but had no effect on  
151 the GCaMP6s response (Fig. 3h-j). Taken together, these data indicate that the rDA1m, rDA1h, and  
152 DA2m sensors can detect dopaminergic activity in brain slices with high specificity, sensitivity and  
153 temporospatial resolution. Moreover, our results confirm that the red fluorescent DA sensors are  
154 spectrally compatible with green fluorescent probes, allowing for simultaneous dual-color imaging.

155

156 ***In vivo* imaging of DA in *Drosophila*.** In *Drosophila*, dopaminergic activity in the mushroom body  
157 (MB) has been found to be both necessary and sufficient for the associate learning between odor  
158 and aversive experience, e.g. body shock<sup>52-55</sup>. Next, we generated a transgenic *Drosophila*  
159 expressing rDA1m in Kenyon cells (KCs) in the olfactory MB and measured the fluorescence level  
160 of the rDA1m sensor using *in vivo* 2-photon imaging when physiologically relevant stimuli were  
161 presented (Fig. 4a,b). When we delivered either the odorant or body shock, we observed a time-  
162 locked fluorescence increase in the medial lobe of the MB; this increase was blocked by pretreating  
163 the animals with Halo (Fig. 4c,d) and was not observed in flies expressing the DA-insensitive rDA-  
164 mut sensor. Importantly, the endogenous signal did not saturate the rDA1m sensor's response, as  
165 application of 100  $\mu\text{M}$  DA caused a significantly larger, sustained increase in fluorescence (Fig. 4e).

166 We then compared *in vivo* performance between the first-generation and second-generation green  
167 fluorescent DA sensors in flies. Electrical stimulation of the MB medial lobe elicited robust  
168 fluorescence increase in nearby DA sensor-expressing dopaminergic neurons (DANs) with a higher  
169 response observed in DA2m-expressing flies (Fig. 4f,g). The temporal dynamics of the DA2m and  
170 DA1m responses ( $\tau_{\text{on}}$  and  $\tau_{\text{off}}$ ) were similar (Fig. 4l) and both responses were blocked by Halo (Fig.  
171 4h-k). The spatial patterns of the responses in the MB during odorant or body shock delivery were  
172 also similar between DA2m- and DA1m-expressing flies<sup>31</sup> while consistently higher responses were  
173 observed in DA2m-expressing flies (Fig. 4m-o). In a separate experiment, we compared the *in vivo*  
174 performance of DA2m with dLight1.3b, which has the highest dynamic range among the dLight  
175 series of sensors, and found that DA2m produced a 3-fold larger response (Supplementary Fig. S2k-  
176 o).

177 Previous studies have found that the *Drosophila* MB is innervated by the axonal neuropils from  
178 15 DAN subgroups, with each lobe containing axons from one to approximately two dozens of  
179 neurons<sup>56,57,58</sup>. We next asked whether our highly sensitive DA2m sensor could detect DA release  
180 in individual MB compartments, even when the source of DA is from a single neuron. As a proof-  
181 of-principle experiment, we co-expressed the red light-activated channelrhodopsin CsChrimson<sup>59</sup>  
182 in DANs and DA2m in KCs. We then used 635 nm wavelength light to activate the only DAN  
183 neuron innervating the  $\gamma 2\alpha'1$  compartment or the 8–21 neurons innervating the  $\gamma 5$  compartment  
184 while measuring DA2m fluorescence (Fig. 4p). We found that the change in DA2m fluorescence  
185 was both time-locked to the CsChrimson activation and spatially confined to the respective  
186 compartments, supporting functional independence among MB compartments (Fig. 4q,r).

187 To confirm that the DA2m sensor does not couple to Gi signaling *in vivo*, we used cAMP level  
188 as a proxy for Gi signaling and expressed the red fluorescent cAMP sensor Pink-Flamindo<sup>60</sup> to  
189 measure body shock-evoked increase in cAMP in KCs. We found that the presence of the DA2m  
190 sensor had no effect on cAMP production (Supplementary Fig. S3). Thus, these data confirm that  
191 the DA2m sensor does not affect the endogenous signaling pathways *in vivo*.

192

193 **Red and green fluorescent DA sensors can be used to detect optogenetically induced**  
194 **nigrostriatal DA release in freely moving mice.** To demonstrate that our new DA sensors can be  
195 used to measure dopaminergic activity in freely moving animals, we measured DA dynamics in the  
196 mouse dorsal striatum, which receives motor control-related nigrostriatal dopaminergic projections  
197 from the substantia nigra pars compacta (SNc)<sup>61</sup>, by expressing the optogenetic tool C1V1<sup>62</sup> in the  
198 SNc and various DA sensors in the dorsal striatum. To provide a frame of reference for the red and  
199 green fluorescent sensors, we also co-expressed EGFP or tdTomato, respectively, in the dorsal  
200 striatum (Fig. 5a,b). C1V1-mediated optogenetic activation of DANs in the SNc elicited a robust  
201 transient increase in DA sensor fluorescence in the dorsal striatum (Fig. 5e,g,i,k). Importantly, the  
202 signal was prolonged by the DA transporter blocker methylphenidate and blocked by the D<sub>2</sub>R  
203 antagonist eticlopride (Fig. 5e-l); in contrast, the signal was unaffected by the NE transporter blocker  
204 desipramine and the  $\alpha_2$ -adrenergic receptor antagonist yohimbine (Supplementary Fig. S4). As a  
205 control, the DA-insensitive sensor rDA-mut did not respond to C1V1-mediated optogenetic  
206 activation (Fig. 5c,d). Finally, both EGFP fluorescence and tdTomato fluorescence were unchanged  
207 throughout the experiments, indicating a lack of movement-related artifacts during recording. Thus,  
208 our new DA sensors can detect optogenetically induced DA release in freely moving mice with high  
209 sensitivity and high molecular specificity.

210

211 **Detection of dopaminergic activity in the mouse NAc during sexual behavior.** We previously  
212 showed<sup>31</sup> that dopaminergic activity can be measured during male sexual behavior<sup>4</sup>. To ask whether  
213 our improved DA2h performs better than the DA1h sensor in reporting real-time DA dynamics in  
214 freely moving mice, we expressed DA1h in one side of the NAc and DA2h in the contralateral NAc,  
215 and performed bilateral fiber photometry recording during mating (Fig. 6a,b). We found that the  
216 DA1h and DA2h signals were closely correlated in time. Consistent with the improved performance  
217 of DA2h in other systems, the DA2h sensor had a significantly higher fluorescence change ( $\Delta F/F_0$ )  
218 than DA1h during various stages of sexual behavior (Fig. 6c-f).

219 We next compared the performance of red fluorescent rDA1m sensor with that of the best green  
220 fluorescent DA sensor, DA2h. We co-injected viruses expressing rDA1m and DA2h into the NAc



221 core and performed dual-color fiber photometry recording three weeks after virus injection (Fig.  
222 6g,h). We found that despite the dynamic range ( $\Delta F/F_0$ ) of the rDA1m is smaller than that of DA2h  
223 (Supplementary Fig. S5 and S6), rDA1m and DA2h detected qualitatively similar DA release during  
224 sexual behavior when the responses are Z scores (Fig. 6i,k,l). The moment-to-moment correlation  
225 coefficient between rDA1m and DA2h is similar to that between DA1h and DA2h (Fig. 6d,j).  
226 Importantly, we did not observe crosstalk between the red and green DA sensors as no signal in the  
227 red channel was detected when only 470 nm light was delivered and *vice versa* (Supplementary Fig.  
228 S6). Taken together, the rDA1m is capable of detecting DA release *in vivo* during natural behaviors  
229 and the behavior-related DA responses detected by the red and green DA sensors are qualitatively  
230 similar.

231

## 232 Discussion

233 Here, we report the development and characterization of a new set of genetically encoded DA  
234 sensors. Moreover, we show that these sensors can be used to measure DA release in mouse brain  
235 slices, as well as in the *Drosophila* olfactory system and the NAc in freely moving mice during  
236 sexual behavior. Importantly, these sensors can report DA release evoked by electrical stimulation,  
237 optogenetic activation, and various physiologically relevant stimuli and behaviors. The availability  
238 of both high-affinity and medium-affinity versions provides the opportunity to probe DA dynamics  
239 over a broad range of concentrations. Moreover, the DA2m sensor provides an ideal balance of  
240 sensitivity, dynamic range, and brightness, making it a powerful tool for monitoring DA dynamics  
241 *in vivo* with a high signal-to-noise ratio in several models, including flies and mice<sup>63,64</sup>.

242 DA has long been regarded as a neuromodulator that can diffuse broadly and exert its effects  
243 over a large volume with both slow and fast kinetics as well as tonic and phasic release patterns.  
244 However, several key questions regarding dopaminergic activity remain unanswered. For example,  
245 how are the release and postsynaptic effects of DA organized at the spatiotemporal level? How does  
246 DA release at a given time affect synaptic plasticity and the transfer of information to specific  
247 neuronal subpopulations? How is dopaminergic activity regulated by various neuromodulators?  
248 Addressing these fundamental questions requires cell type-specific tools that can be used to monitor  
249 DA dynamics in real time with high spatial resolution, high molecular specificity, high sensitivity,  
250 and rapid kinetics, thereby improving our understanding of the role that DA plays in both health and  
251 disease. In this respect, our DA sensors provide a suitable tool that can be combined with other  
252 techniques such as optogenetics, calcium imaging, and electrophysiology.

253 Neuromodulatory neurons such as dopaminergic neurons send their projections throughout the  
254 brain, and each brain region can receive several neuromodulators. These various neurochemical  
255 pathways closely interact in order to regulate behavior in a state-dependent and highly cooperative  
256 manner. Thus, our red fluorescent rGRAB<sub>DA</sub> sensors provide a new strategy for studying the  
257 interplay between various neuromodulators and neurotransmitters, given that our red fluorescent  
258 DA sensors are spectrally compatible with green fluorescent sensors such as the GRAB<sub>ACh</sub>  
259 sensor<sup>65,66</sup> and GRAB<sub>NE</sub> sensor<sup>67</sup>, allowing the simultaneous monitoring of DA with acetylcholine  
260 and norepinephrine, respectively. In addition, combining the red fluorescent DA sensors with green  
261 fluorescent GCaMPs can provide new insights regarding the putative role that DA plays in  
262 regulating pre- and/or post-neuronal activities, as well as the function of target neural circuits and  
263 behaviors. Finally, several studies have shown that the GRAB-based sensor strategy can be easily  
264 used to create genetically encoded sensors based on a wide range of G-protein-coupled

265 receptors<sup>31,65-67</sup>, leading to a robust and versatile multi-color toolbox that can be used to create  
266 comprehensive functional maps of neurochemical activity.  
267

268 **Methods**

269 **Animals.** Postnatal 0-day-old (P0) Sprague-Dawley rats (Beijing Vital River Laboratory) and adult  
270 (P42–90) wild-type C57BL/6N (Beijing Vital River Laboratory), wild-type C57BL/6J (Charles  
271 River Laboratories), and DAT-IRES-Cre mice (Jackson Laboratory, stock number 06660) were used  
272 in this study. All animals were housed in a temperature-controlled room with a 12 h/12 h light-dark  
273 cycle. All procedures for animal surgery, maintenance, and behavior were performed using protocols  
274 that were approved by the respective animal care and use committees at Peking University, New  
275 York University, and the US National Institutes of Health.

276 The transgenic *Drosophila* lines UAS-rDA1m, UAS-rDA-mut, UAS-DA2m, UAS-dLight1.3b,  
277 and UAS-Pink-Flamindo were generated using Phi-C31-directed integration into attp40 or  
278 VK00005 at the Core Facility of Drosophila Resource and Technology, Shanghai Institute of  
279 Biochemistry and Cell Biology, Chinese Academy of Sciences. The following *Drosophila* lines were  
280 also used in this study: UAS-DA1m (BDSC: 80047), R13F02-Gal4 (BDSC: 49032), 30y-Gal4, and  
281 TH-Gal4-3p3-RFP<sup>68</sup> (all gifts from Yi Rao, Peking University, Beijing); MB312C-Gal4 (Fly light:  
282 2135360); MB315C-Gal4 (Fly light: 2135363); and UAS-CsChrimson-mCherry (a gift from Chuan  
283 Zhou, Institute of Zoology, Chinese Academy of Sciences, Beijing). The flies were raised on  
284 standard cornmeal-yeast medium at 25°C, 70% relative humidity, and a 12 h/12 h light-dark cycle.  
285 Adult female flies within 2 weeks after eclosion were used for fluorescence imaging.

286  
287 **Molecular Biology.** DNA fragments were generated using PCR amplification with primers  
288 (TSINGKE Biological Technology) containing 30 bp of overlap. The fragments were then  
289 assembled into plasmids using Gibson assembly<sup>69</sup>. All plasmid sequences were verified using  
290 Sanger sequencing (TSINGKE Biological Technology). For characterization in HEK293T cells, the  
291 genes expressing the red and green DA sensors were cloned into the pDisplay vector, with an IgK  
292 leader sequence inserted upstream of the sensor gene. The IRES-EGFP-CAAX gene (for red DA  
293 sensors) or IRES-mCherry-CAAX gene (for green DA sensors) was attached downstream of the  
294 sensor gene and was used as a membrane marker and to calibrate the fluorescence signal intensity.  
295 Site-directed mutagenesis was performed using primers containing randomized NNB codons (48  
296 codons in total, encoding 20 possible amino acids) or defined codons on the target sites. For  
297 characterization in cultured neurons, the sensor genes were cloned into the pAAV vector under the  
298 control of the human synapsin promoter (hSyn). To generate stable cell lines expressing wild-type  
299 D<sub>2</sub>R, rDA1h, or DA2h, we generated a vector called pPacific, containing various elements,  
300 including 30 TR, the myc tag gene, a 2A sequence, the mCherry gene, the puromycin gene, and 50  
301 TR; the genes were then cloned into the pPacific vector using Gibson assembly. Two mutations  
302 (S103P and S509G) were introduced in pCS7-PiggyBAC (ViewSolid Biotech) to generate a  
303 hyperactive piggyBac transposase<sup>70</sup> for generating stable cell lines. For the TANGO assay, the wild-  
304 type D<sub>2</sub>R, rDA1h, or DA2h genes were cloned into the pTango vector<sup>47</sup>. For the luciferase  
305 complementation assay, we replaced the  $\beta_2$ AR gene in the  $\beta_2$ AR-Smbit construct<sup>46</sup> with the wild-  
306 type D<sub>2</sub>R, rDA1h, or DA2h genes. To generate transgenic fly lines, the respective sensor genes were  
307 cloned into the pUAST vector, which was then used for P-element-mediated random insertion.

308  
309 **Preparation and fluorescence imaging of cultured cells.** HEK293T cells were cultured in DMEM  
310 (Gibco) supplemented with 10% (v/v) fetal bovine serum (Gibco) and 1% penicillin-streptomycin  
311 (Gibco) at 37°C in 5% CO<sub>2</sub>. The cells were plated on 96-well plates or 12 mm glass coverslips in



312 24-well plates and grown to 60% confluence for transfection. For transfection, the cells were  
313 incubated in a mixture containing 1  $\mu\text{g}$  DNA and 3  $\mu\text{g}$  PEI for 6 h. Fluorescence imaging was  
314 performed 24–48 h after transfection. Rat cortical neurons were prepared from P0 Sprague-Dawley  
315 rat pups (Beijing Vital River Laboratory). In brief, cortical neurons were dissociated from dissected  
316 rat brains in 0.25% Trypsin-EDTA (Gibco), plated on 12 mm glass coverslips coated with poly-D-  
317 lysine (Sigma-Aldrich), and cultured in Neurobasal medium (Gibco) containing 2% B-27  
318 supplement (Gibco), 1% GlutaMAX (Gibco), and 1% penicillin-streptomycin (Gibco) at 37°C in 5%  
319 CO<sub>2</sub>. The neurons were transfected with an AAV expressing rDA1m, rDA1h, DA2m, DA2h, or  
320 dLight1.1 (Vigene Biosciences) after 7–9 days in culture, and fluorescence imaging was performed  
321 3–7 days after transfection.

322 Cultured cells were imaged using an inverted Ti-E A1 confocal microscope (Nikon) and the Opera  
323 Phenix high-content screening system (PerkinElmer). The confocal microscope was equipped with  
324 a 40 $\times$ /1.35 NA oil-immersion objective, a 488 nm laser, and a 561 nm laser. During fluorescence  
325 imaging, the cells were either bathed or perfused in a chamber containing Tyrode's solution  
326 consisting of (in mM): 150 NaCl, 4 KCl, 2 MgCl<sub>2</sub>, 2 CaCl<sub>2</sub>, 10 HEPES, and 10 glucose (pH 7.4).  
327 Solutions containing various concentrations of drugs of DA (Sigma-Aldrich) and/or 1  $\mu\text{M}$  Halo  
328 (Tocris), SCH-23390 (Tocris), Etic (Tocris), L-DOPA (Abcam), 5-HT (Tocris), histamine (Tocris),  
329 Glu (Sigma-Aldrich), GABA (Tocris), Ado (Tocris), ACh (Solarbio), NE (Tocris), Tyr (Sigma-  
330 Aldrich), or Oct (Tocris) were delivered via a custom-made perfusion system or via bath application.  
331 Between experiments, the chamber was thoroughly cleaned with 75% ethanol, 3% hydrogen  
332 peroxide, and Tyrode's solution. GFP fluorescence was collected using a 525/50 nm emission filter,  
333 and RFP fluorescence was collected using a 595/50 nm emission filter. Photostability was measured  
334 under 1-photon illumination (confocal microscopy) using a 488 nm laser at 350  $\mu\text{W}$ , and  
335 photostability was measured under 2-photon illumination using a 920 nm laser at 27.5 mW.  
336 Photobleaching was applied to the entire sensor-expressing HEK293T cell at an area of 200  $\mu\text{m}^2$ .  
337 Blue light-mediated photoactivation was measured using a 488 nm laser at 350  $\mu\text{W}$ . The Opera  
338 Phenix high-content screening system was equipped with a 60 $\times$ /1.15 NA water-immersion objective,  
339 a 488 nm laser, and a 561 nm laser. GFP fluorescence was collected using a 525/50 nm emission  
340 filter, and RFP fluorescence was collected using a 600/30 nm emission filter. Where indicated, the  
341 culture medium was replaced with 100  $\mu\text{l}$  Tyrode's solution containing various concentrations of  
342 the indicated drugs. The red and green sensors' fluorescence intensity was calibrated using EGFP  
343 and mCherry, respectively.

344

345 **Spectra measurements.** HEK293T cells stably expressing rDA1m, rDA1h, or DA2h were  
346 harvested and transferred to a 96-well plate in the absence or presence of 100  $\mu\text{M}$  DA, and excitation  
347 and emission spectra were measured at 5 nm increments using a Safire2 multi-mode plate reader  
348 (Tecan).

349

350 **Luciferase complementation assay.** The luciferase complementation assay was performed as  
351 previously described<sup>46</sup>. In brief, 24–48 h after transfection, HEK293T cells expressing rDA1h or  
352 DA2h were washed in PBS, harvested by trituration, and transferred to 96-well plates. DA at various  
353 concentrations (ranging from 1 nM to 100  $\mu\text{M}$ ) was applied to the cells, and furimazine (NanoLuc  
354 Luciferase Assay, Promega) was then applied to a final concentration of 5  $\mu\text{M}$ , after which  
355 luminescence was measured using a Victor X5 multi-label plate reader (PerkinElmer).

356

357 **TANGO assay.** DA was applied at various concentrations (ranging from 0.1 nM to 10  $\mu$ M) to a  
358 reporter cell line stably expressing a tTA-dependent luciferase reporter and a  $\beta$ -arrestin2-TEV fusion  
359 gene<sup>47</sup> transfected to express wild-type D<sub>2</sub>R, rDA1h, or DA2h. The cells were then cultured for 12  
360 h to allow for luciferase expression. Bright-Glo (Fluc Luciferase Assay System, Promega) was then  
361 applied to a final concentration of 5  $\mu$ M, and luminescence was measured using a VICTOR X5  
362 multi-label plate reader (PerkinElmer).

363

364 **Preparation and fluorescence imaging of acute brain slices.** Wild-type adult (P42-56) C57BL/6N  
365 mice were anesthetized with an intraperitoneal injection of 2,2,2-tribromoethanol (Avertin, 500  
366 mg/kg body weight, Sigma-Aldrich), and then placed in a stereotaxic frame for AAV injection using  
367 a microsyringe pump (Nanoliter 2000 Injector, WPI). In Fig. 5a-e, AAVs expressing hSyn-rDA1m,  
368 hSyn-rDA1h, or hSyn-DA2m (Vigene Biosciences) were injected (400 nl per injection site) into the  
369 NAc using the following coordinates: AP: +1.4 mm relative to Bregma, ML:  $\pm$ 1.2 mm relative to  
370 Bregma, depth: 4.0 mm from the dura. In Fig. 5f-k, the AAV expressing hSyn-rDA1m (Vigene  
371 Biosciences) was injected (400 nl per injection site) into the NAc using the coordinates listed above,  
372 and the AAV expressing hSyn-axon-GCaMP6s (BrainVTA) was injected (400 nl per injection site)  
373 into the VTA using the following coordinates: AP: -3.2 mm relative to Bregma, ML:  $\pm$ 0.5 mm  
374 relative to Bregma, depth: 4.1 mm from the dura.

375 Two weeks after virus injection, the mice were anesthetized with an intraperitoneal injection of  
376 Avertin (500 mg/kg body weight) and perfused with ice-cold oxygenated slicing buffer containing  
377 (in mM): 110 choline-Cl, 2.5 KCl, 1 NaH<sub>2</sub>PO<sub>4</sub>, 25 NaHCO<sub>3</sub>, 7 MgCl<sub>2</sub>, 25 glucose, and 0.5 CaCl<sub>2</sub>.  
378 The brains were immediately removed and placed in ice-cold oxygenated slicing buffer. The brains  
379 were sectioned into 300  $\mu$ m thick slices using a VT1200 vibratome (Leica), and the slices were  
380 incubated at 34°C for at least 40 min in oxygenated artificial cerebrospinal fluid (ACSF) containing  
381 (in mM): 125 NaCl, 2.5 KCl, 1 NaH<sub>2</sub>PO<sub>4</sub>, 25 NaHCO<sub>3</sub>, 1.3 MgCl<sub>2</sub>, 25 glucose, and 2 CaCl<sub>2</sub>. For  
382 fluorescence imaging, the slices were transferred to an imaging chamber and placed under an  
383 FV1000MPE 2-photon microscope (Olympus) equipped with a 25 $\times$ /1.05 NA water-immersion  
384 objective and a mode-locked Mai Tai Ti: Sapphire laser (Spectra-Physics). A 950 nm laser was used  
385 to excite rDA1m and rDA1h, and fluorescence was collected using a 575–630 nm filter. A 920 nm  
386 laser was used to excite DA2m, and fluorescence was collected using a 495–540 nm filter. For  
387 electrical stimulation, a bipolar electrode (cat. number WE30031.0A3, MicroProbes for Life  
388 Science) was positioned near the core of the NAc using fluorescence guidance. Fluorescence  
389 imaging and electrical stimulation were synchronized using an Arduino board with custom-written  
390 programs. All images collected during electrical stimulation were recorded at a frame rate of 0.1482  
391 s/frame with 128 $\times$ 96 pixels per frame. The stimulation voltage was 4–6 V, and the duration of each  
392 stimulus was 1 ms. Drugs were applied to the imaging chamber by perfusion at a flow rate at 4  
393 ml/min.

394

395 **Fluorescence imaging of transgenic flies.** Adult female flies (within 2 weeks after eclosion) were  
396 used for fluorescence imaging. For imaging, the fly was mounted to a customized chamber using  
397 tape such that the antennae and abdomen were exposed to the air. A section of rectangular cuticle  
398 between the eyes, as well as the air sacs and fat bodies, were then removed to expose the brain,  
399 which was bathed in adult hemolymph-like solution (AHLS) containing (in mM): 108 NaCl, 5 KCl,

400 5 HEPES, 5 trehalose, 5 sucrose, 26 NaHCO<sub>3</sub>, 1 NaH<sub>2</sub>PO<sub>4</sub>, 2 CaCl<sub>2</sub>, and 1–2 MgCl<sub>2</sub>. Fluorescence  
401 imaging was performed using an FV1000MPE 2-photon microscope (Olympus) equipped with a  
402 25×/1.05 NA water-immersion objective and a mode-locked Mai Tai Ti: Sapphire laser (Spectra-  
403 Physics). A 950 nm laser was used to excite rDA1m and Pink-Flamindo, and a 575–630 nm filter  
404 was used to collect the fluorescence signals. A 930 nm laser was used to excite DA2m and  
405 dLight1.3b, and a 495–540 nm filter was used to collect the fluorescence signals. For odorant  
406 stimulation, isoamyl acetate (Sigma-Aldrich) was first diluted 200-fold in mineral oil in a bottle and  
407 then diluted 5-fold in air, which was then delivered to the fly's antennae at a rate of 1000 ml/min.  
408 Halo (Tocris) was added directly to the AHLS at the final concentration. For electrical stimulation,  
409 a glass electrode (0.2 MΩ resistance) was placed in the olfactory mushroom body in the vicinity of  
410 dopaminergic neurons, and the stimulation voltage was set at 20–80 V. For body shock, two wires  
411 were attached to the fly's abdomen, and 60 V electrical pulses (500 ms duration) were delivered.  
412 For DA perfusion, a patch of the blood-brain barrier was carefully removed using tweezers, and  
413 AHLS containing 100 μM DA was applied to exchange the normal bath solution. For optogenetic  
414 stimulation, a 200 mW 635 nm laser (Changchun Liangli photoelectricity Ltd.) was used to deliver  
415 light to the fly brain via an optical fiber. An Arduino board with custom-written programs was used  
416 to synchronize the stimulation and fluorescence imaging. The sampling rate during odorant  
417 stimulation, electrical stimulation, body shock, and DA perfusion was 6.7 Hz, 12 Hz, 6.7 Hz, and 1  
418 Hz, respectively.

419

#### 420 **Fiber photometry recording of optogenetically induced DA release in freely moving mice.**

421 Adult (P42–56) DAT-IRES-Cre mice (Jackson Laboratory, stock number 06660) were anesthetized  
422 with isoflurane and placed in a stereotaxic frame for AAV injection. AAVs expressing hSyn-rDA1m,  
423 hSyn-rDA1h, hSyn-rDA-mut, hSyn-DA2m, or hSyn-DA2h (Vigene Biosciences) as well as hSyn-  
424 EGFP (Addgene, cat. number 50465) or hSyn-tdTomato (a gift from Dr. Yakel's Lab) were injected  
425 (1 μl per site) into the dorsal striatum using the following coordinates: AP: -0.5 mm relative to  
426 Bregma, ML: ±2.4 mm relative to Bregma, depth: 2.2 mm from the dura. The AAV expressing Eflα-  
427 DIO-C1V1-YFP (NIEHS Viral Vector Core) was injected (500 nl per site) into the SNc using the  
428 following coordinates: AP: -3.1 mm relative to Bregma, ML: ±1.5 mm relative to Bregma, depth:  
429 4.0 mm from the dura. Optical fibers (105 μm core/125 μm cladding) were implanted in the dorsal  
430 striatum and SNc 4 weeks after AAV injection. Fiber photometry recording in the dorsal striatum  
431 was performed using a 488 nm laser at 50 μW for DA2m and DA2h, a 488 nm laser at 1 μW and a  
432 561 nm laser at 50 μW for rDA1m, rDA1h, and rDA-mut. C1V1 in the SNc was stimulated using a  
433 561 nm laser at 9.9 mW. The measured emission spectra were fitted using a linear unmixing  
434 algorithm (<https://www.niehs.nih.gov/research/atniehs/labs/ln/pi/iv/tools/index.cfm>). To evoke  
435 C1V1-mediated DA release, pulse trains (10 ms pulses at 20 Hz for 1 s) were delivered to the SNc  
436 using a 561 nm laser at 9.9 mW. To avoid signal decay, the excitation lasers were controlled using  
437 an optical shutter (Thorlabs) in which the shutter was turned on 10 s before the 561 nm pulse trains  
438 and turned off 35 s after stimulation.

439

440 **Fiber photometry recording of DA dynamics in the NAc during sexual behavior.** Adult (P60–  
441 90) wild-type male C57BL/6J mice (Charles River Laboratories) were anesthetized with isoflurane  
442 and placed in a stereotaxic frame for AAV injection. AAVs expressing hSyn-rDA1m or hSyn-DA2h  
443 (Vigene Biosciences) were injected (80–140 nl per site) into the NAc using the following

444 coordinates: AP: +0.98 mm relative to Bregma, ML:  $\pm 1.2$  mm relative to Bregma, depth: 4.6 mm  
445 from the dura. For the co-expression of rDA1m and DA2h in Fig. 6g-l, AAVs expressing hSyn-  
446 rDA1m and hSyn-DA2h were injected at a 1:1 ratio. After AAV injection, optical fibers (400  $\mu$ m  
447 diameter) were implanted in the NAc, and fiber photometry recording was performed two weeks  
448 after AAV injection. The setups for bilateral recording and dual-color recording are shown in Fig.  
449 6a and Fig. 6g, respectively. In brief, a 311 Hz 472/30 nm filtered LED (Thorlabs) at 30  $\mu$ W was  
450 used to excite DA1h and DA2h, and a 400 Hz 590/20 nm filtered LED (Thorlabs) at 30  $\mu$ W was  
451 used to excite rDA1m. A 535/50 nm filter was used to collect the fluorescence signal from DA1h  
452 and DA2h, and a 524/628-25 nm dual-band bandpass filter was used to collect the fluorescence  
453 signal from rDA1m and DA2h during the dual-color recording. The various sexual behaviors are  
454 defined as previously described<sup>31</sup> following published conventions<sup>71</sup>. For immunofluorescence, the  
455 mice were anesthetized and then perfused with 4% paraformaldehyde (PFA). The brains were  
456 removed, fixed in 4% PFA for 4 h, and then cryoprotected in 20% (w/v) sucrose for 24 h. The brains  
457 were then embedded in tissue-freezing medium and sectioned into 60  $\mu$ m thick slices using a  
458 CM1900 cryostat (Leica). rDA1m was immunostained using a rabbit anti-RFP antibody (1:1000,  
459 Takara, cat. number 632496) followed by a Cy3-conjugated donkey anti-rabbit secondary antibody  
460 (1:1000, Jackson ImmunoResearch, cat. number 113713). DA1h and DA2h were immunostained  
461 using a chicken anti-GFP antibody (1:1000, Abcam, cat. number ab13970) followed by an Alexa  
462 488-conjugated donkey anti-chicken secondary antibody (1:1000, Jackson ImmunoResearch, cat.  
463 number 116967).

464

465 **Quantification and statistical analysis.** Imaging data from cultured cells, acute brain slices, and  
466 transgenic flies were processed using ImageJ software (NIH). Pseudocolor images were generated  
467 using custom-written programs. The fluorescence response ( $\Delta F/F_0$ ) was calculated using the  
468 formula  $[(F-F_0)/F_0]$ , in which  $F_0$  is the baseline fluorescence signal. The signal-to-noise ratio (SNR)  
469 was calculated as the peak response divided by the standard error of the baseline fluorescence  
470 fluctuation. Summary data are presented as the mean  $\pm$  s.e.m., and group data were analyzed using  
471 the Student's *t*-test, one-way ANOVA (Supplementary Fig. S5) or two-way ANOVA (Fig. 6). Where  
472 indicated, \* $p < 0.05$ , \*\* $p < 0.01$ , \*\*\* $p < 0.001$ , and n.s., not significant ( $p > 0.05$ ).

473

474 **Data and software availability.** Plasmids expressing the sensors used in this study were deposited  
475 at Addgene ([https://www.addgene.org/Yulong\\_Li/](https://www.addgene.org/Yulong_Li/)). The custom-written programs will be provided  
476 upon request to the lead contact, Yulong Li ([Yulongli@pku.edu.cn](mailto:Yulongli@pku.edu.cn)).

477

#### 478 **Acknowledgments**

479 This work was supported by the Beijing Municipal Science & Technology Commission  
480 (Z181100001318002), the Beijing Brain Initiative of Beijing Municipal Science & Technology  
481 Commission (Z181100001518004), Guangdong Grant 'Key Technologies for Treatment of Brain  
482 Disorders' (2018B030332001), the General Program of National Natural Science Foundation of  
483 China (projects 31671118, 31871087, and 31925017), the NIH BRAIN Initiative (NS103558), and  
484 grants from the Peking-Tsinghua Center for Life Sciences and the State Key Laboratory of  
485 Membrane Biology at Peking University School of Life Sciences to Y.L.; the NIH (grants  
486 R01MH101377 and R21HD090563) and an Irma T. Hirsch Career Scientist Award to D.L.; and the  
487 Intramural Research Program of the US NIH/NIEHS (1ZIAES103310) to G.C.. We thank Yi Rao

488 for sharing the 2-photon microscope and Xiaoguang Lei at PKU-CLS for providing support for the  
489 Opera Phenix high-content screening system.

490

#### 491 **Author contributions**

492 Y.L. supervised the study. F.S., Y.L. designed the study. F.S., Y. Zhuo, and Y. Zhang performed the  
493 experiments related to developing, optimizing, and characterizing the sensors in cultured HEK293T  
494 cells and neurons with help from J.F., H.D. and C.Q.. F.S. and T.Q. performed the surgery and 2-  
495 photon imaging experiments related to the validation of the sensors in acute brain slices. X.L., K.T.,  
496 and J. Zeng performed the 2-photon imaging experiments in transgenic flies. J. Zhou performed the  
497 fiber photometry recordings during optogenetics in freely moving mice under the supervision of  
498 G.C.. B.D. performed the fiber photometry recordings in the mouse NAc during sexual behavior  
499 under the supervision of D.L.. All authors contributed to the data interpretation and analysis. F.S.  
500 and Y.L. wrote the manuscript with input from all authors.

501

#### 502 **Competing interests**

503 F.S. and Y. L. have filed patent applications whose value might be affected by this publication.

504

#### 505 **References**

- 506 1 Björklund, A. & Dunnett, S. B. Dopamine neuron systems in the brain: an update. *Trends in neurosciences*  
507 **30**, 194-202 (2007).
- 508 2 Wise, R. A. Dopamine and reward: the anhedonia hypothesis 30 years on. *Neurotoxicity research* **14**, 169-  
509 183 (2008).
- 510 3 Ikemoto, S. Brain reward circuitry beyond the mesolimbic dopamine system: a neurobiological theory.  
511 *Neuroscience & biobehavioral reviews* **35**, 129-150 (2010).
- 512 4 Berridge, K. C. & Robinson, T. E. What is the role of dopamine in reward: hedonic impact, reward learning,  
513 or incentive salience? *Brain research reviews* **28**, 309-369 (1998).
- 514 5 Schultz, W. Dopamine reward prediction-error signalling: a two-component response. *Nature Reviews*  
515 *Neuroscience* **17**, 183 (2016).
- 516 6 Wise, R. A. Dopamine, learning and motivation. *Nature reviews neuroscience* **5**, 483-494 (2004).
- 517 7 Holroyd, C. B. & Coles, M. G. The neural basis of human error processing: reinforcement learning,  
518 dopamine, and the error-related negativity. *Psychological review* **109**, 679 (2002).
- 519 8 Nicoullon, A. Dopamine and the regulation of cognition and attention. *Progress in neurobiology* **67**, 53-  
520 83 (2002).
- 521 9 Graybiel, A. M., Aosaki, T., Flaherty, A. W. & Kimura, M. The basal ganglia and adaptive motor control.  
522 *Science* **265**, 1826-1831 (1994).
- 523 10 Lotharius, J. & Brundin, P. Pathogenesis of Parkinson's disease: dopamine, vesicles and  $\alpha$ -synuclein.  
524 *Nature Reviews Neuroscience* **3**, 932-942 (2002).
- 525 11 Di Chiara, G. & Imperato, A. Drugs abused by humans preferentially increase synaptic dopamine  
526 concentrations in the mesolimbic system of freely moving rats. *Proceedings of the National Academy of*  
527 *Sciences* **85**, 5274-5278 (1988).
- 528 12 Cook Jr, E. H. *et al.* Association of attention-deficit disorder and the dopamine transporter gene. *American*  
529 *journal of human genetics* **56**, 993 (1995).
- 530 13 Howes, O. D. & Kapur, S. The dopamine hypothesis of schizophrenia: version III—the final common  
531 pathway. *Schizophrenia bulletin* **35**, 549-562 (2009).



- 532 14 Arnsten, A. F. & Dudley, A. G. Methylphenidate improves prefrontal cortical cognitive function through  
533  $\alpha 2$  adrenoceptor and dopamine D1 receptor actions: Relevance to therapeutic effects in Attention Deficit  
534 Hyperactivity Disorder. *Behavioral and Brain Functions* **1**, 2 (2005).
- 535 15 Deutch, A. Y. & Young, C. D. A model of the stress-induced activation of prefrontal cortical dopamine  
536 systems: Coping and the development of post-traumatic stress disorder. (1995).
- 537 16 Grace, A. A. Dysregulation of the dopamine system in the pathophysiology of schizophrenia and  
538 depression. *Nature Reviews Neuroscience* **17**, 524 (2016).
- 539 17 Granon, S. *et al.* Enhanced and impaired attentional performance after infusion of D1 dopaminergic  
540 receptor agents into rat prefrontal cortex. *Journal of neuroscience* **20**, 1208-1215 (2000).
- 541 18 Lee, J. C., Wang, L. P. & Tsien, J. Z. Dopamine rebound-excitation theory: putting brakes on PTSD.  
542 *Frontiers in psychiatry* **7**, 163 (2016).
- 543 19 Okubo, Y. *et al.* Decreased prefrontal dopamine D1 receptors in schizophrenia revealed by PET. *Nature*  
544 **385**, 634-636 (1997).
- 545 20 Pitman, R. K. *et al.* Biological studies of post-traumatic stress disorder. *nature Reviews neuroscience* **13**,  
546 769-787 (2012).
- 547 21 Chefer, V. I., Thompson, A. C., Zapata, A. & Shippenberg, T. S. Overview of brain microdialysis. *Current*  
548 *protocols in neuroscience* **47**, 7.1. 1-7.1. 28 (2009).
- 549 22 Tidey, J. W. & Miczek, K. A. Social defeat stress selectively alters mesocorticolimbic dopamine release:  
550 an in vivo microdialysis study. *Brain research* **721**, 140-149 (1996).
- 551 23 Robinson, D. L., Venton, B. J., Heien, M. L. & Wightman, R. M. Detecting subsecond dopamine release  
552 with fast-scan cyclic voltammetry in vivo. *Clinical chemistry* **49**, 1763-1773 (2003).
- 553 24 Robinson, D. L., Hermans, A., Seipel, A. T. & Wightman, R. M. Monitoring rapid chemical  
554 communication in the brain. *Chemical reviews* **108**, 2554-2584 (2008).
- 555 25 Jaquins-Gerstl, A. & Michael, A. C. A review of the effects of FSCV and microdialysis measurements on  
556 dopamine release in the surrounding tissue. *Analyst* **140**, 3696-3708 (2015).
- 557 26 Muller, A., Joseph, V., Slesinger, P. A. & Kleinfeld, D. Cell-based reporters reveal in vivo dynamics of  
558 dopamine and norepinephrine release in murine cortex. *Nature methods* **11**, 1245 (2014).
- 559 27 Inagaki, H. K. *et al.* Visualizing neuromodulation in vivo: TANGO-mapping of dopamine signaling reveals  
560 appetite control of sugar sensing. *Cell* **148**, 583-595 (2012).
- 561 28 Lee, D. *et al.* Temporally precise labeling and control of neuromodulatory circuits in the mammalian brain.  
562 *Nature methods* **14**, 495 (2017).
- 563 29 Kim, M. W. *et al.* Time-gated detection of protein-protein interactions with transcriptional readout. *Elife*  
564 **6**, e30233 (2017).
- 565 30 Barnea, G. *et al.* The genetic design of signaling cascades to record receptor activation. *Proceedings of the*  
566 *National Academy of Sciences* **105**, 64-69 (2008).
- 567 31 Sun, F. *et al.* A Genetically Encoded Fluorescent Sensor Enables Rapid and Specific Detection of  
568 Dopamine in Flies, Fish, and Mice. *Cell* **174**, 481-496 e419, doi:10.1016/j.cell.2018.06.042 (2018).
- 569 32 Patriarchi, T. *et al.* Ultrafast neuronal imaging of dopamine dynamics with designed genetically encoded  
570 sensors. *Science* **360**, 1420+, doi:ARTN eaat4422  
571 10.1126/science.aat4422 (2018).
- 572 33 Tanaka, M., Sun, F., Li, Y. & Mooney, R. A mesocortical dopamine circuit enables the cultural transmission  
573 of vocal behaviour. *Nature* **563**, 117-120, doi:10.1038/s41586-018-0636-7 (2018).
- 574 34 Zhou, M. *et al.* Suppression of GABAergic neurons through D2-like receptor secures efficient conditioning  
575 in *Drosophila* aversive olfactory learning. *Proc Natl Acad Sci U S A* **116**, 5118-5125,



- 576 doi:10.1073/pnas.1812342116 (2019).
- 577 35 Handler, A. *et al.* Distinct Dopamine Receptor Pathways Underlie the Temporal Sensitivity of Associative  
578 Learning. *Cell* **178**, 60-75 e19, doi:10.1016/j.cell.2019.05.040 (2019).
- 579 36 Shu, X. *et al.* Mammalian expression of infrared fluorescent proteins engineered from a bacterial  
580 phytochrome. *Science* **324**, 804-807 (2009).
- 581 37 Alford, S. C., Wu, J., Zhao, Y., Campbell, R. E. & Knöpfel, T. Optogenetic reporters. *Biology of the Cell*  
582 **105**, 14-29 (2013).
- 583 38 Zhao, Y. *et al.* An expanded palette of genetically encoded Ca(2)(+) indicators. *Science* **333**, 1888-1891,  
584 doi:10.1126/science.1208592 (2011).
- 585 39 Wu, J. *et al.* Improved orange and red Ca(2)+/- indicators and photophysical considerations for optogenetic  
586 applications. *ACS Chem Neurosci* **4**, 963-972, doi:10.1021/cn400012b (2013).
- 587 40 Akerboom, J. *et al.* Genetically encoded calcium indicators for multi-color neural activity imaging and  
588 combination with optogenetics. *Frontiers in molecular neuroscience* **6**, 2 (2013).
- 589 41 Dana, H. *et al.* Sensitive red protein calcium indicators for imaging neural activity. *Elife* **5**,  
590 doi:10.7554/eLife.12727 (2016).
- 591 42 Bungay, P. M., Newton-Vinson, P., Isele, W., Garris, P. A. & Justice Jr, J. B. Microdialysis of dopamine  
592 interpreted with quantitative model incorporating probe implantation trauma. *Journal of neurochemistry*  
593 **86**, 932-946 (2003).
- 594 43 Florin-Lechner, S. M., Druhan, J. P., Aston-Jones, G. & Valentino, R. J. Enhanced norepinephrine release  
595 in prefrontal cortex with burst stimulation of the locus coeruleus. *Brain research* **742**, 89-97 (1996).
- 596 44 Pacak, K., Palkovits, M., Kopin, I. J. & Goldstein, D. S. Stress-induced norepinephrine release in the  
597 hypothalamic paraventricular nucleus and pituitary-adrenocortical and sympathoadrenal activity: in vivo  
598 microdialysis studies. *Frontiers in neuroendocrinology* **16**, 89-150 (1995).
- 599 45 Smith, A. D., Olson, R. J. & Justice, J. B., Jr. Quantitative microdialysis of dopamine in the striatum: effect  
600 of circadian variation. *J Neurosci Methods* **44**, 33-41, doi:10.1016/0165-0270(92)90111-p (1992).
- 601 46 Wan, Q. *et al.* Mini G protein probes for active G protein-coupled receptors (GPCRs) in live cells. *Journal*  
602 *of Biological Chemistry* **293**, 7466-7473 (2018).
- 603 47 Kroeze, W. K. *et al.* PRESTO-Tango as an open-source resource for interrogation of the druggable human  
604 GPCRome. *Nature structural & molecular biology* **22**, 362 (2015).
- 605 48 Daw, N. D. & Tobler, P. N. in *Neuroeconomics* 283-298 (Elsevier, 2014).
- 606 49 Glimcher, P. W. Understanding dopamine and reinforcement learning: the dopamine reward prediction  
607 error hypothesis. *Proceedings of the National Academy of Sciences* **108**, 15647-15654 (2011).
- 608 50 Gonzales, R. A., Job, M. O. & Doyon, W. M. The role of mesolimbic dopamine in the development and  
609 maintenance of ethanol reinforcement. *Pharmacology & therapeutics* **103**, 121-146 (2004).
- 610 51 Broussard, G. J. *et al.* In vivo measurement of afferent activity with axon-specific calcium imaging. *Nat*  
611 *Neurosci* **21**, 1272-1280, doi:10.1038/s41593-018-0211-4 (2018).
- 612 52 Schwaerzel, M. *et al.* Dopamine and octopamine differentiate between aversive and appetitive olfactory  
613 memories in *Drosophila*. *Journal of Neuroscience* **23**, 10495-10502 (2003).
- 614 53 Kim, Y.-C., Lee, H.-G. & Han, K.-A. D1 dopamine receptor dDA1 is required in the mushroom body  
615 neurons for aversive and appetitive learning in *Drosophila*. *Journal of Neuroscience* **27**, 7640-7647 (2007).
- 616 54 Schroll, C. *et al.* Light-induced activation of distinct modulatory neurons triggers appetitive or aversive  
617 learning in *Drosophila* larvae. *Current biology* **16**, 1741-1747 (2006).
- 618 55 Claridge-Chang, A. *et al.* Writing memories with light-addressable reinforcement circuitry. *Cell* **139**, 405-  
619 415 (2009).

- 620 56 Tanaka, N. K., Tanimoto, H. & Ito, K. Neuronal assemblies of the Drosophila mushroom body. *Journal of*  
621 *Comparative Neurology* **508**, 711-755 (2008).
- 622 57 Mao, Z. & Davis, R. L. Eight different types of dopaminergic neurons innervate the Drosophila mushroom  
623 body neuropil: anatomical and physiological heterogeneity. *Frontiers in neural circuits* **3**, 5 (2009).
- 624 58 Aso, Y. *et al.* The neuronal architecture of the mushroom body provides a logic for associative learning.  
625 *elife* **3**, e04577 (2014).
- 626 59 Klapoetke, N. C. *et al.* Independent optical excitation of distinct neural populations. *Nature methods* **11**,  
627 338 (2014).
- 628 60 Harada, K. *et al.* Red fluorescent protein-based cAMP indicator applicable to optogenetics and in vivo  
629 imaging. *Scientific reports* **7**, 1-9 (2017).
- 630 61 Alcaro, A., Huber, R. & Panksepp, J. Behavioral functions of the mesolimbic dopaminergic system: an  
631 affective neuroethological perspective. *Brain research reviews* **56**, 283-321 (2007).
- 632 62 Yizhar, O. *et al.* Neocortical excitation/inhibition balance in information processing and social dysfunction.  
633 *Nature* **477**, 171-178 (2011).
- 634 63 Liang, X. *et al.* Morning and Evening Circadian Pacemakers Independently Drive Premotor Centers via a  
635 Specific Dopamine Relay. *Neuron* **102**, 843-857 e844, doi:10.1016/j.neuron.2019.03.028 (2019).
- 636 64 Kim, H. R. *et al.* A unified framework for dopamine signals across timescales. *BioRxiv*,  
637 doi:10.1101/803437 (2019).
- 638 65 Jing, M. *et al.* A genetically encoded fluorescent acetylcholine indicator for in vitro and in vivo studies.  
639 *Nat Biotechnol* **36**, 726-737, doi:10.1038/nbt.4184 (2018).
- 640 66 Jing, M. *et al.* An optimized acetylcholine sensor for monitoring in vivo cholinergic activity.  
641 doi:10.1101/861690 (2019).
- 642 67 Feng, J. *et al.* A Genetically Encoded Fluorescent Sensor for Rapid and Specific In Vivo Detection of  
643 Norepinephrine. *Neuron* **102**, 745-761 e748, doi:10.1016/j.neuron.2019.02.037 (2019).
- 644 68 Deng, B. *et al.* Chemoconnectomics: mapping chemical transmission in Drosophila. *Neuron* **101**, 876-893.  
645 e874 (2019).
- 646 69 Gibson, D. G. *et al.* Enzymatic assembly of DNA molecules up to several hundred kilobases. *Nat Methods*  
647 **6**, 343-345, doi:10.1038/nmeth.1318 (2009).
- 648 70 Yusa, K., Zhou, L., Li, M. A., Bradley, A. & Craig, N. L. A hyperactive piggyBac transposase for  
649 mammalian applications. *Proceedings of the National Academy of Sciences* **108**, 1531-1536 (2011).
- 650 71 Hull, E. M., Meisel, R. L. & Sachs, B. D. in *Hormones, brain and behavior* 3-137 (Elsevier, 2002).  
651

### The novel red fluorescent DA sensors

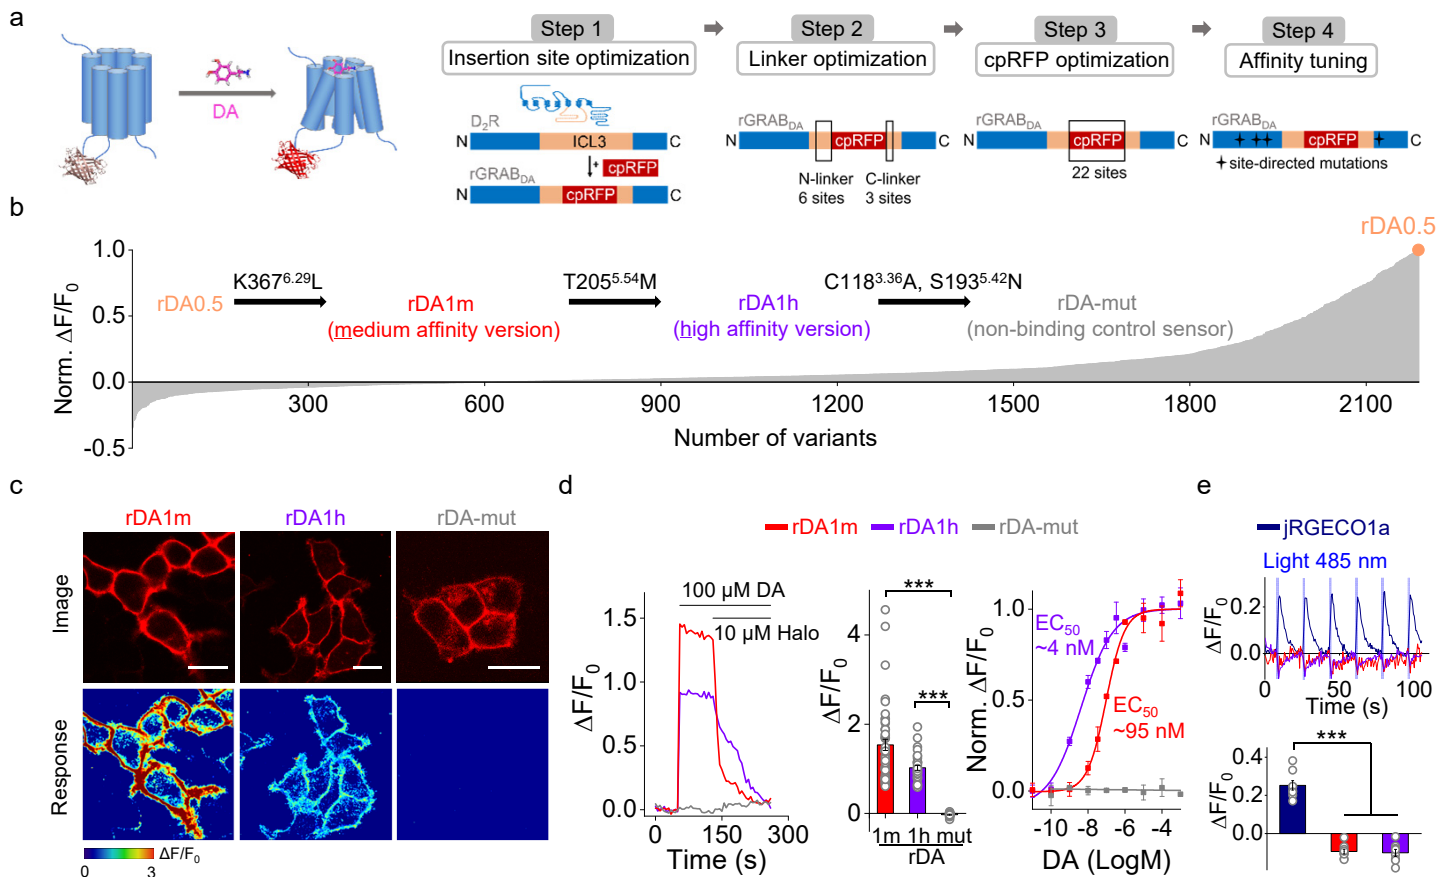

### The second-generation of green fluorescent DA sensors

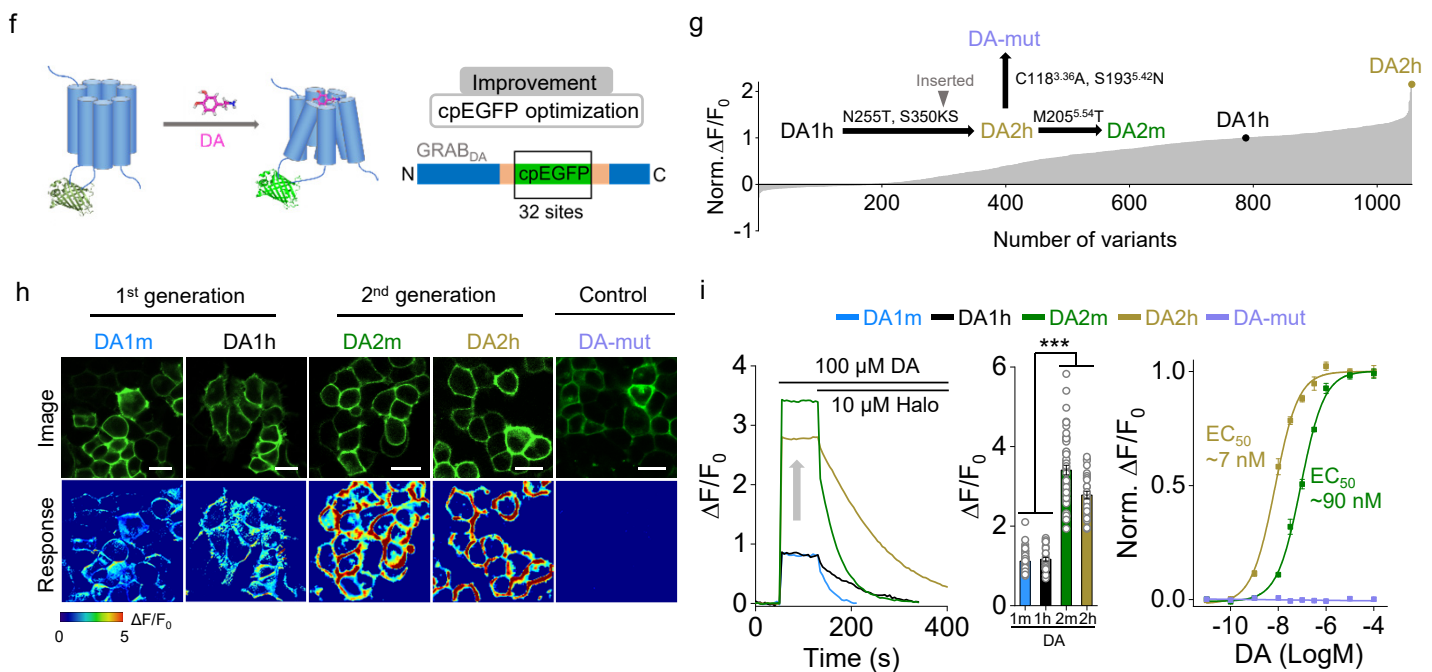

**Fig. 1 | Development and characterization of two novel red fluorescent DA sensors and second-generation green fluorescent DA sensors.**





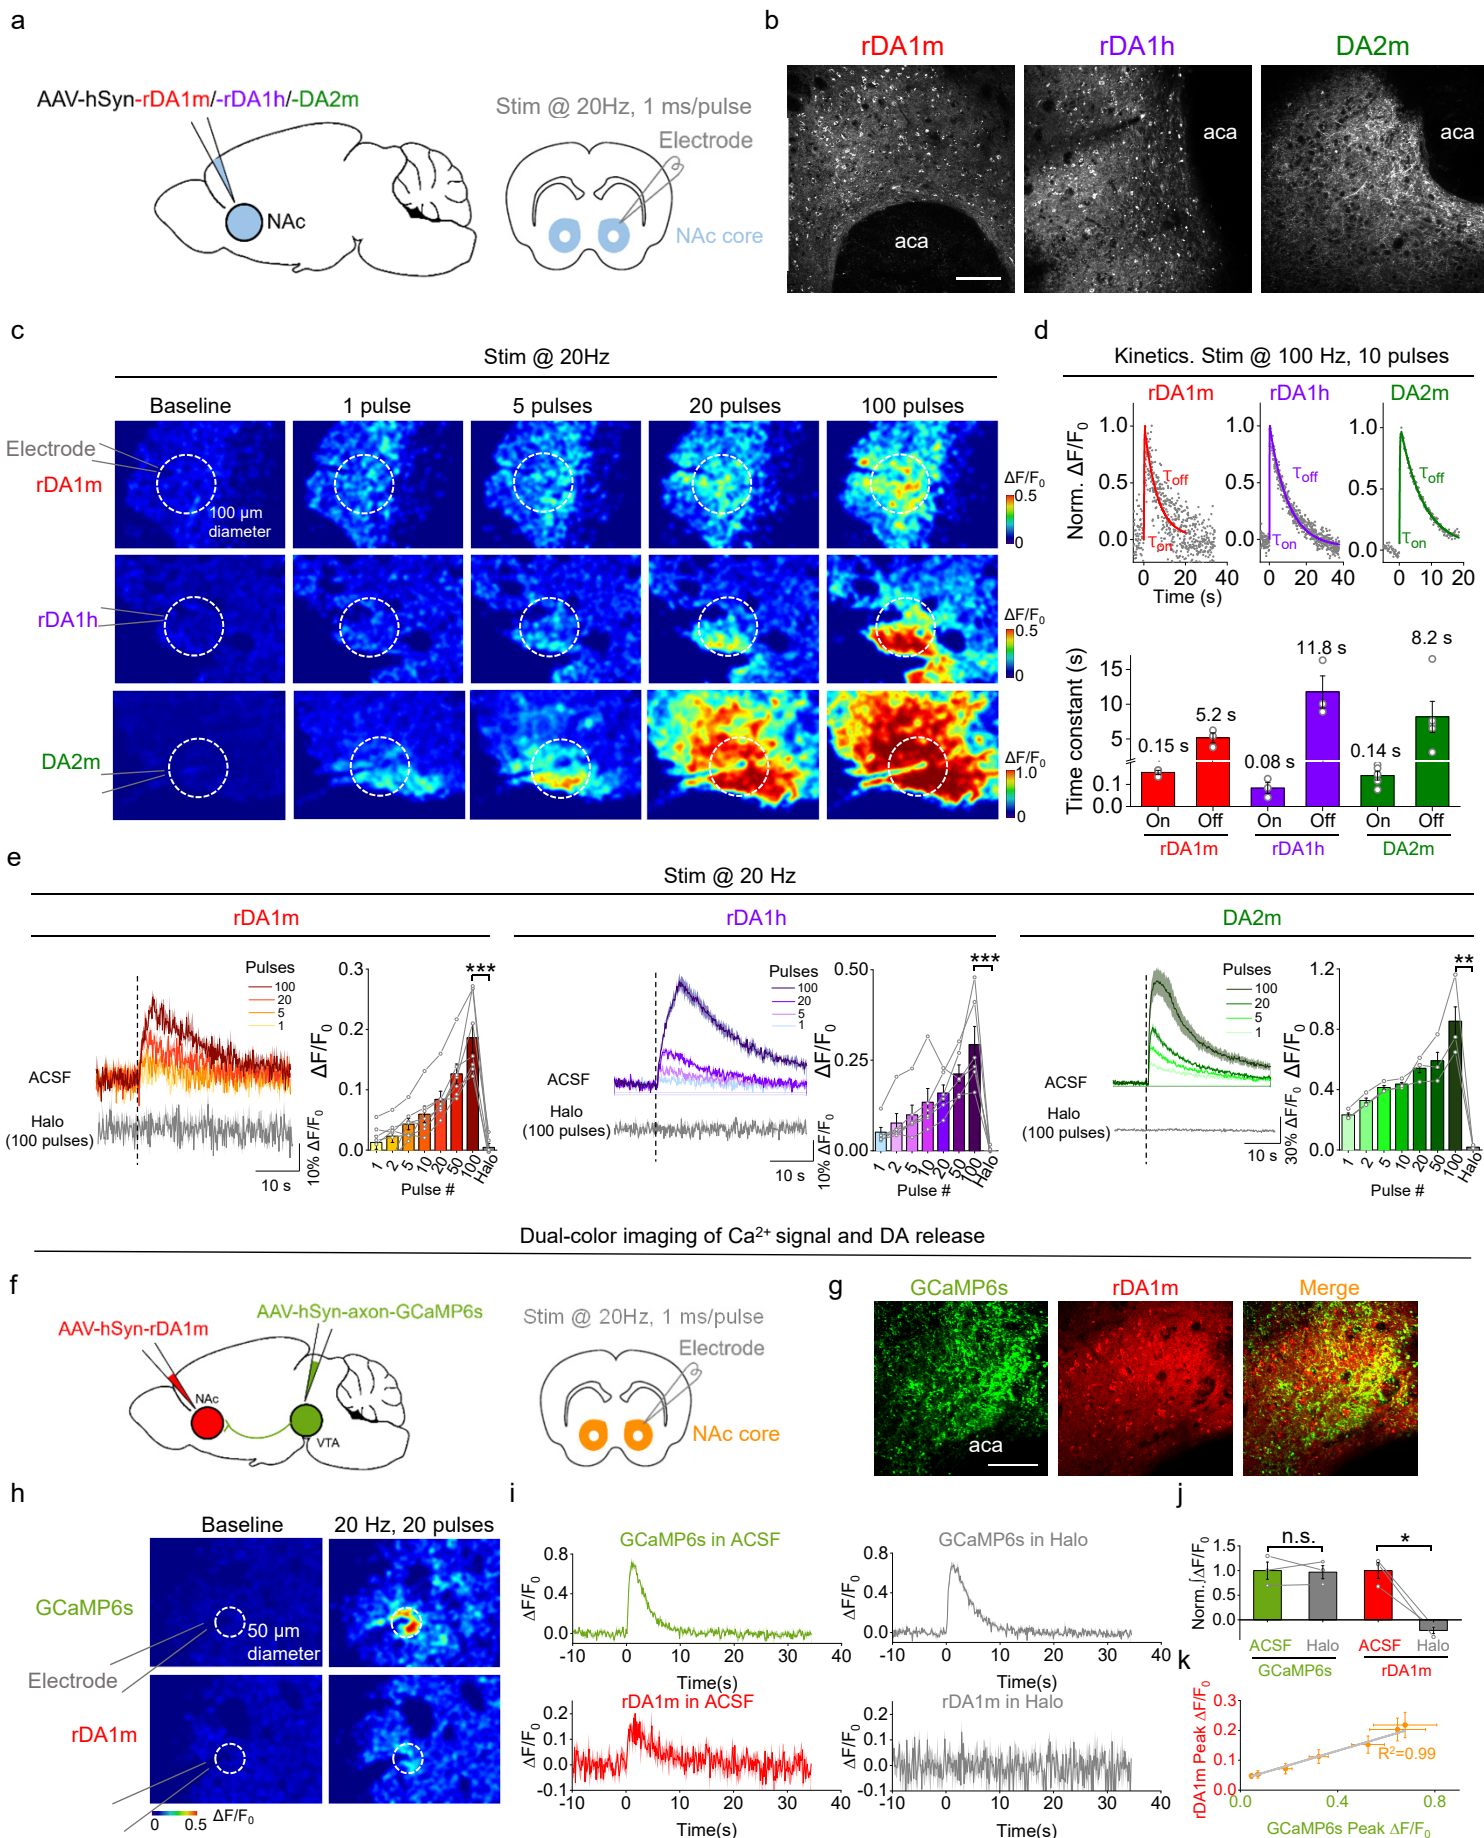

**Fig. 3 | GRAB<sub>DA</sub> sensors can be used to measure DA release in acute mouse brain slices.**

### Validation of rDA1m in *Drosophila* brain

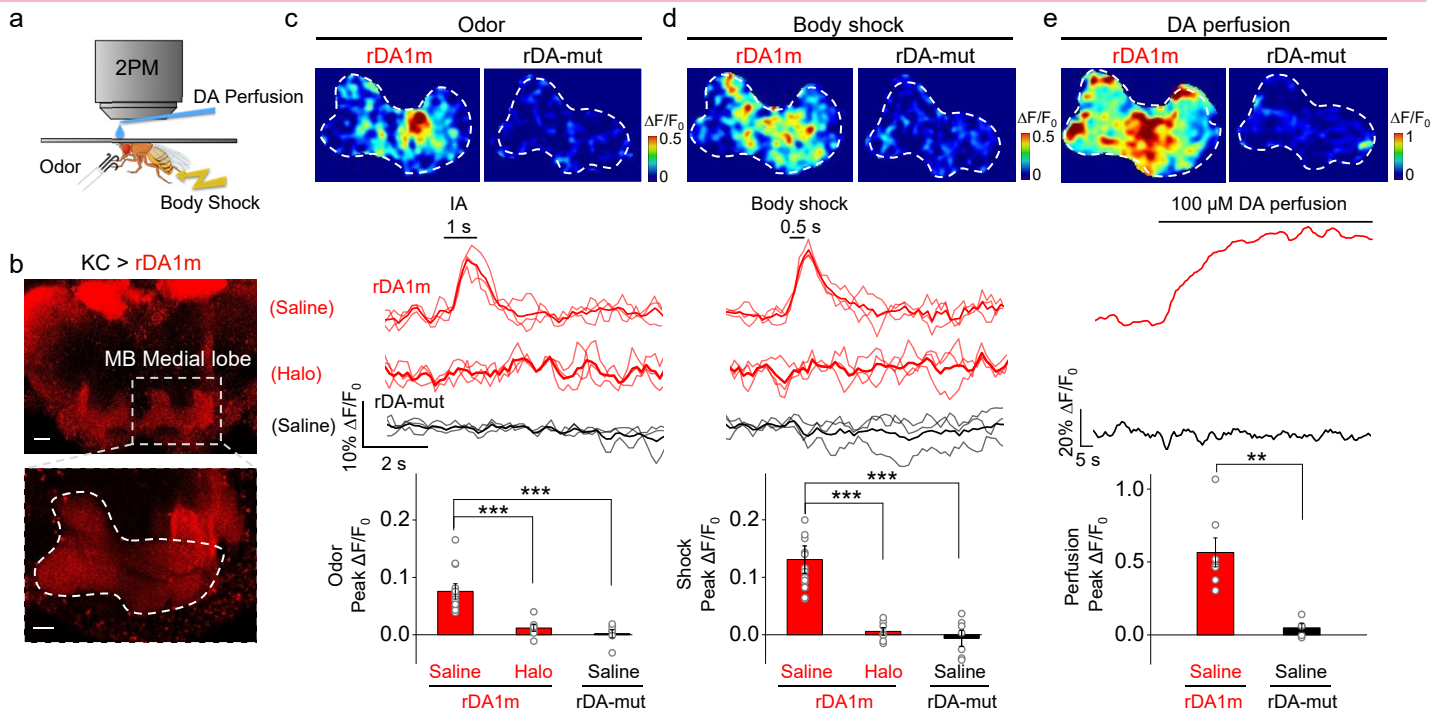

### Validation of DA2m in *Drosophila* brain

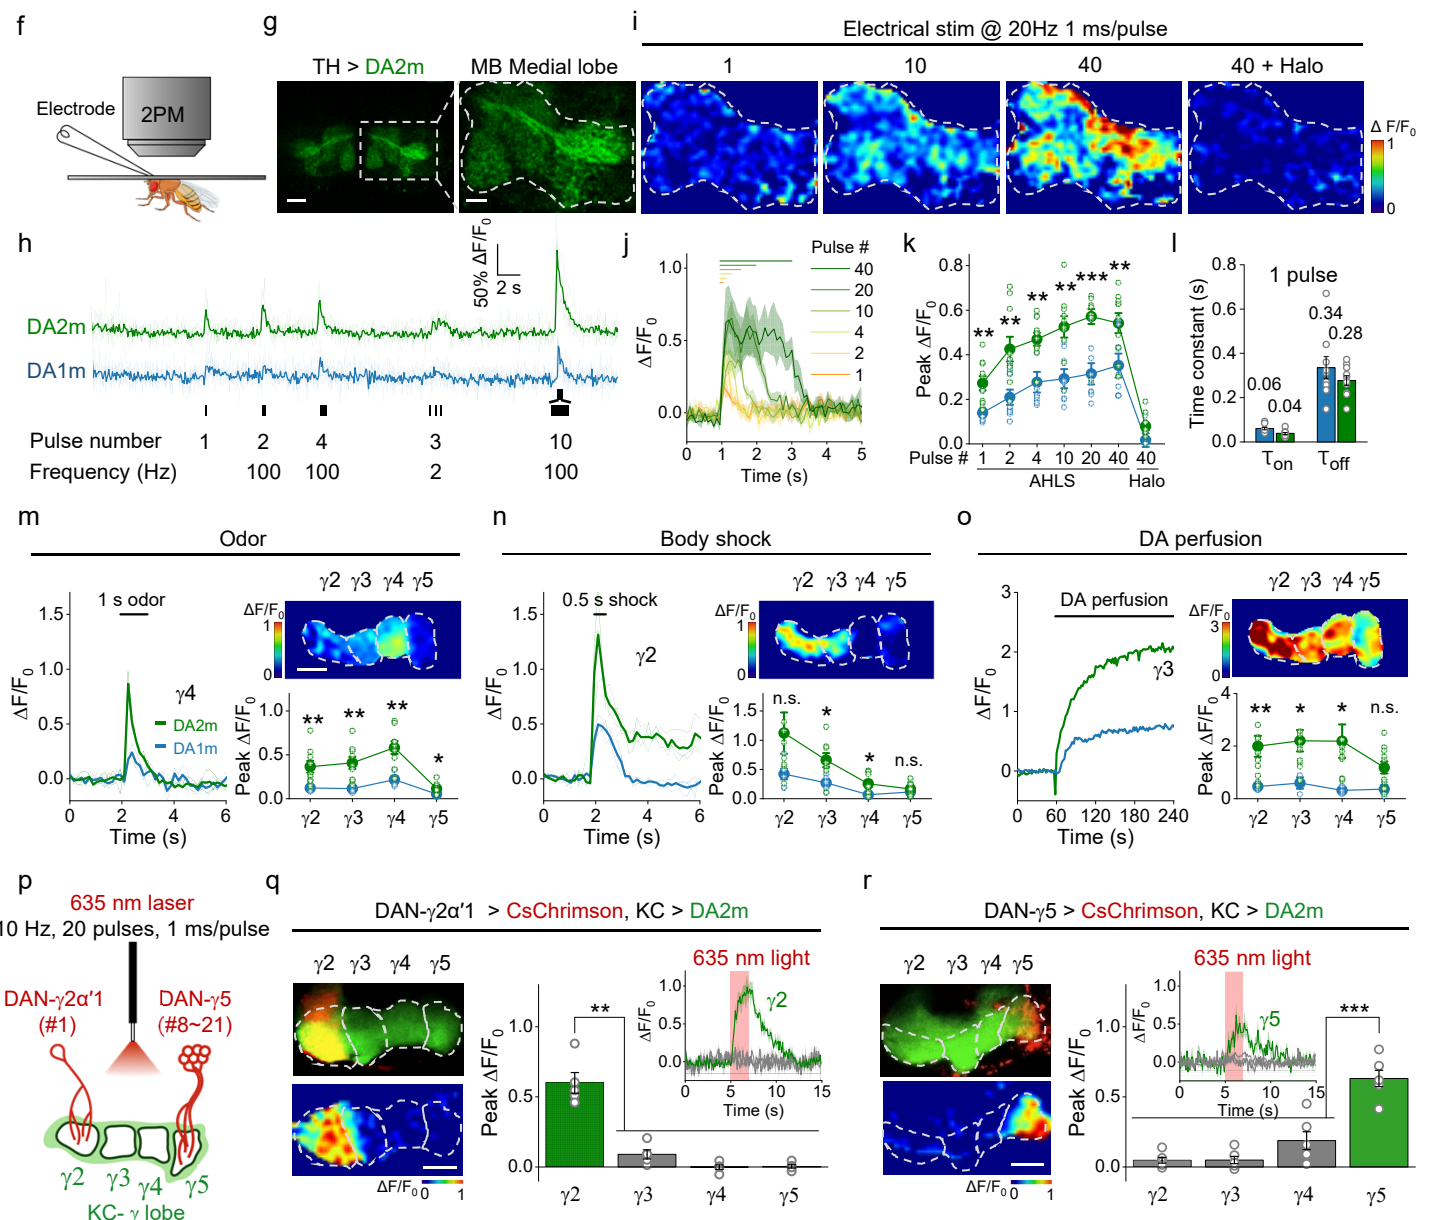

**Fig. 4** | *In vivo* 2-photon imaging of DA dynamics in *Drosophila* using GRAB<sub>DA</sub> sensors.



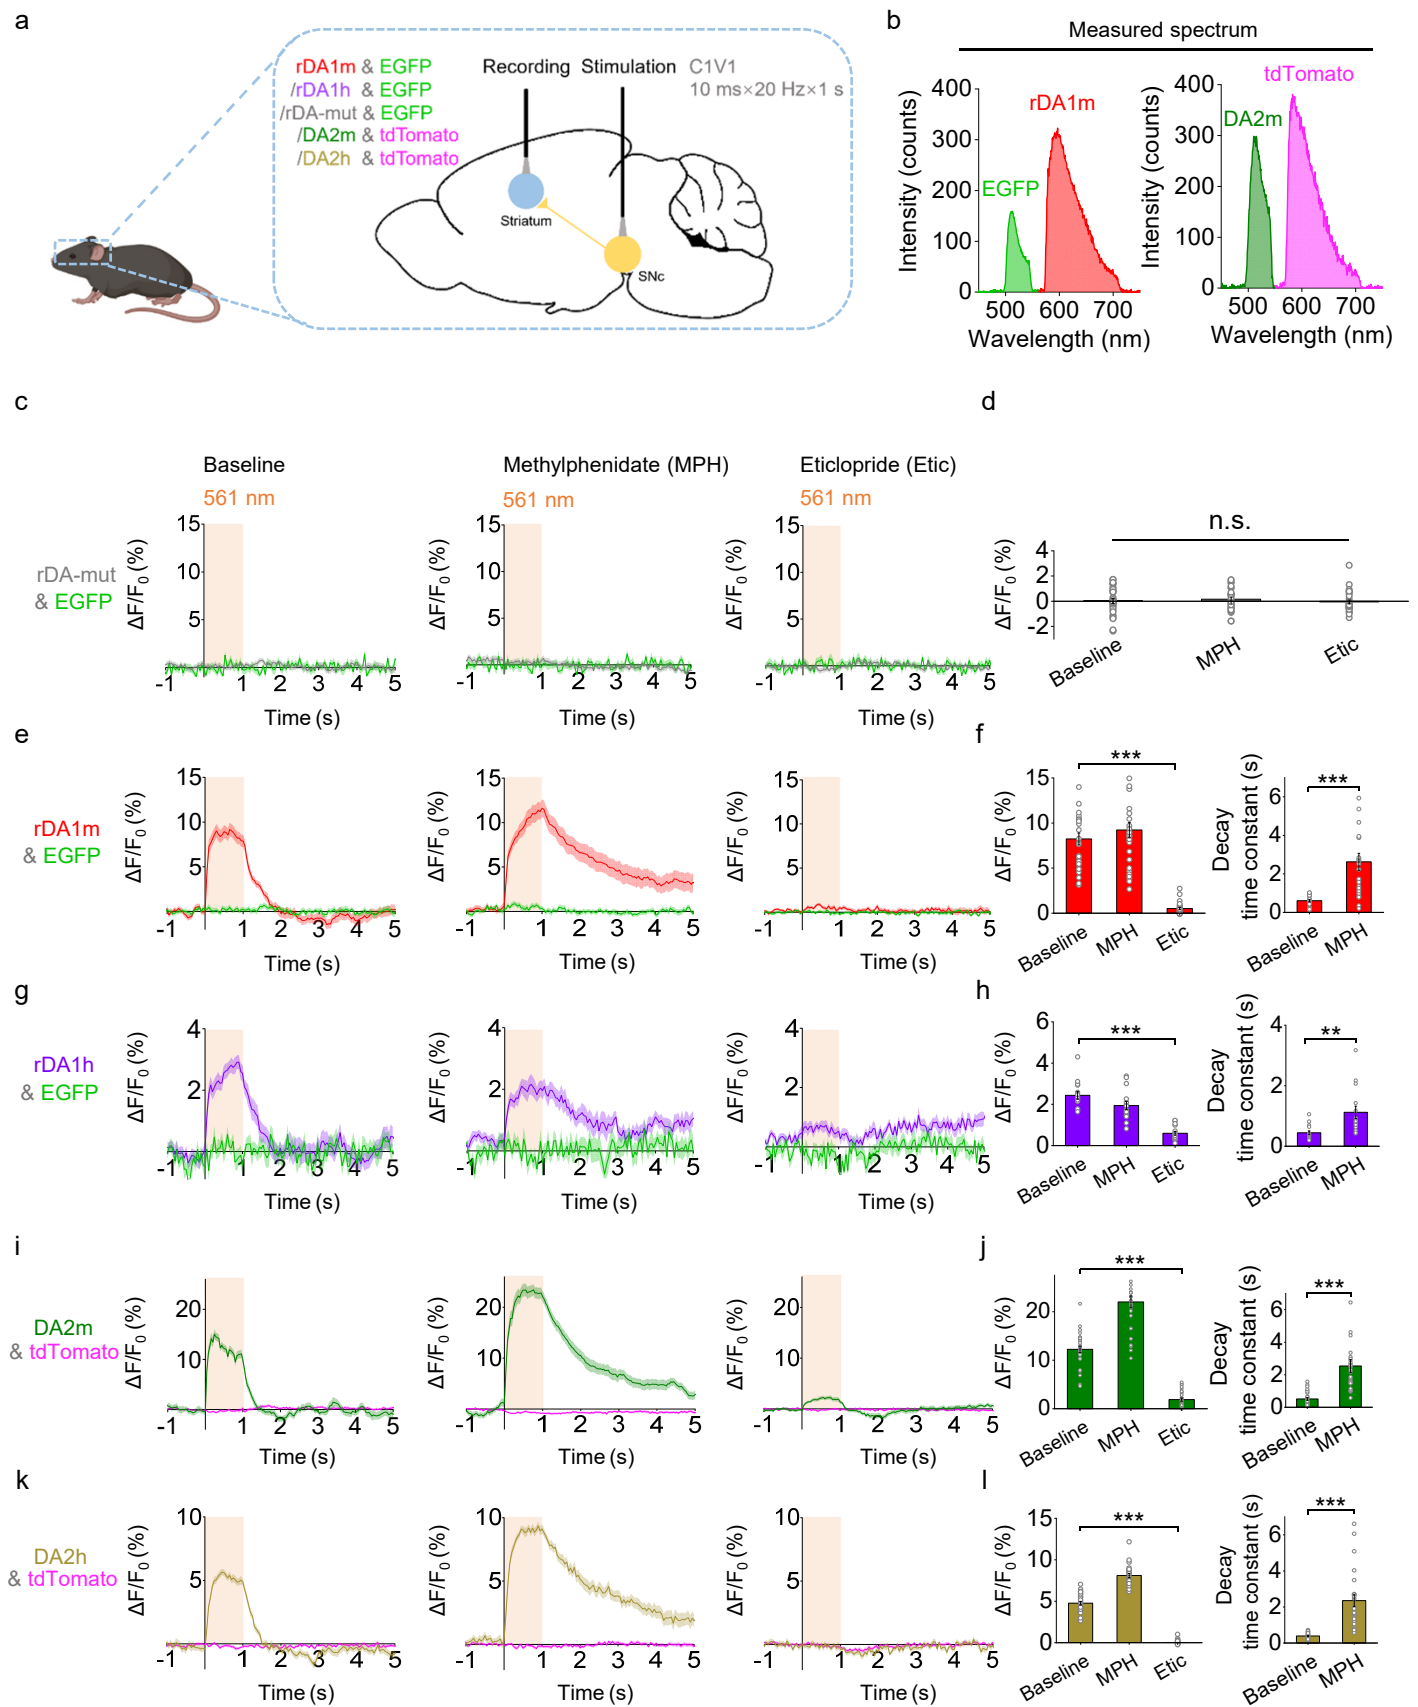

**Fig. 5 | GRAB<sub>DA</sub> sensors can detect optogenetically induced nigrostriatal DA release in freely moving mice.**

### Comparison of DA1h and DA2h by bilateral recording

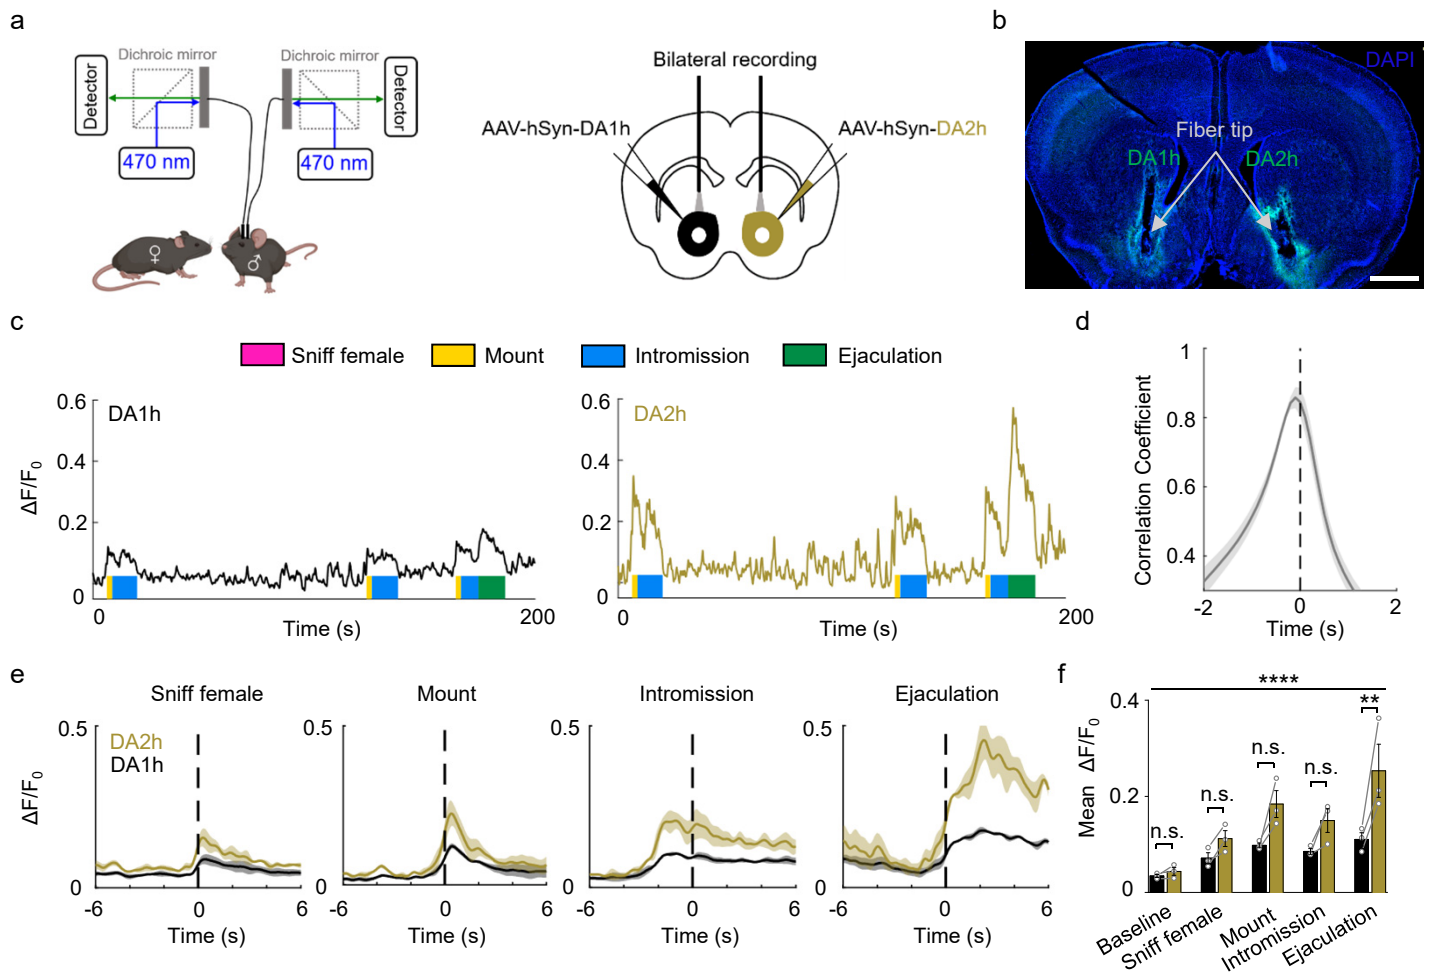

### Comparison of rDA1m and DA2h by dual-color recording

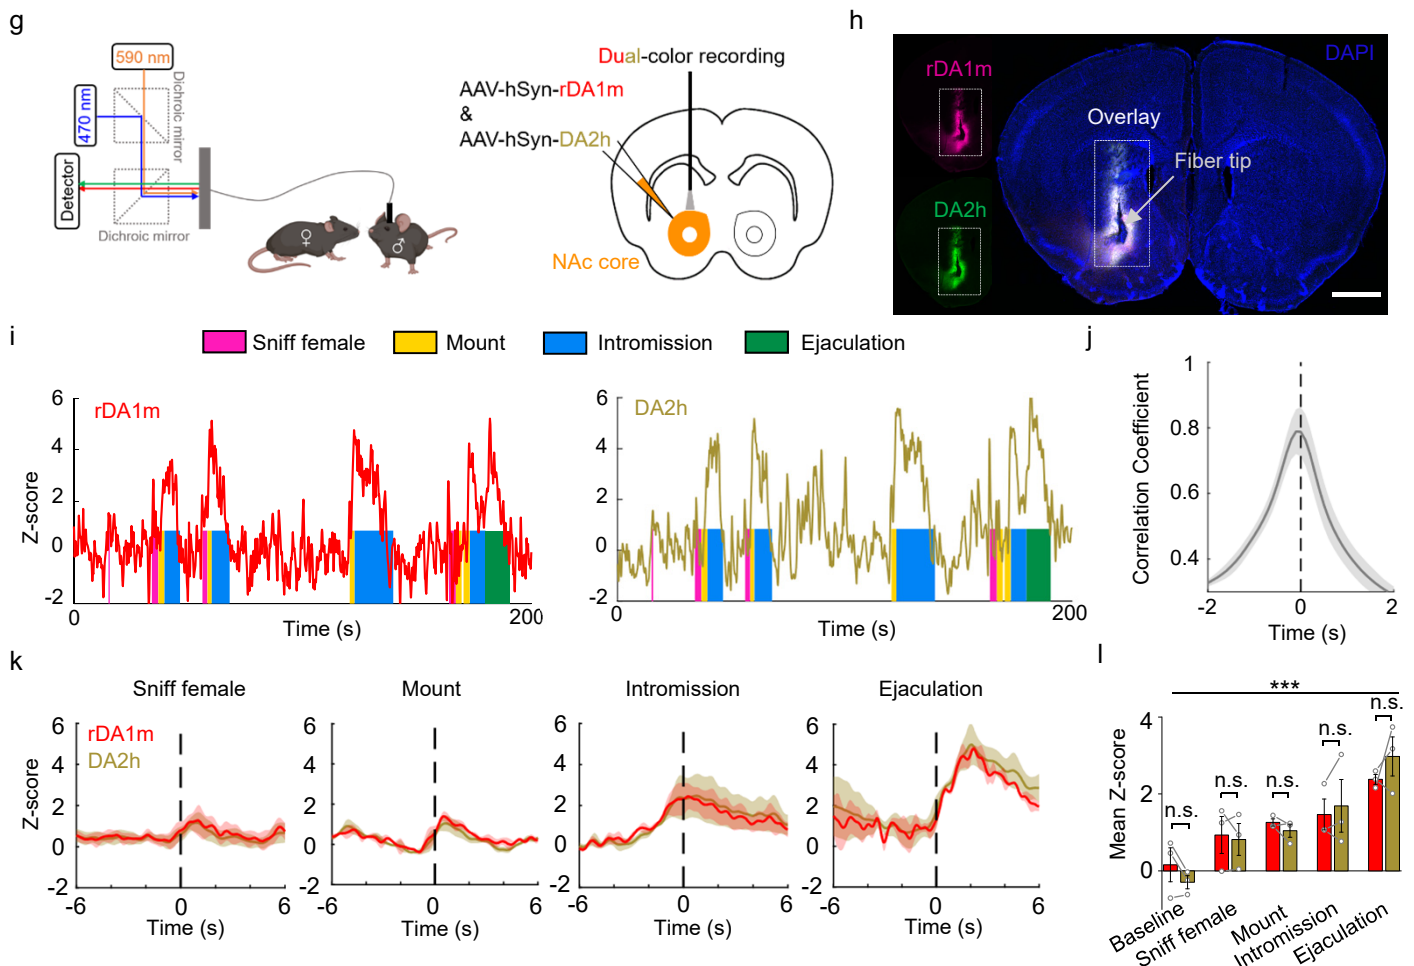

**Fig. 6 | GRAB<sub>DA</sub> sensors can be used to measure dopaminergic activity in the mouse NAc during sexual behavior.**

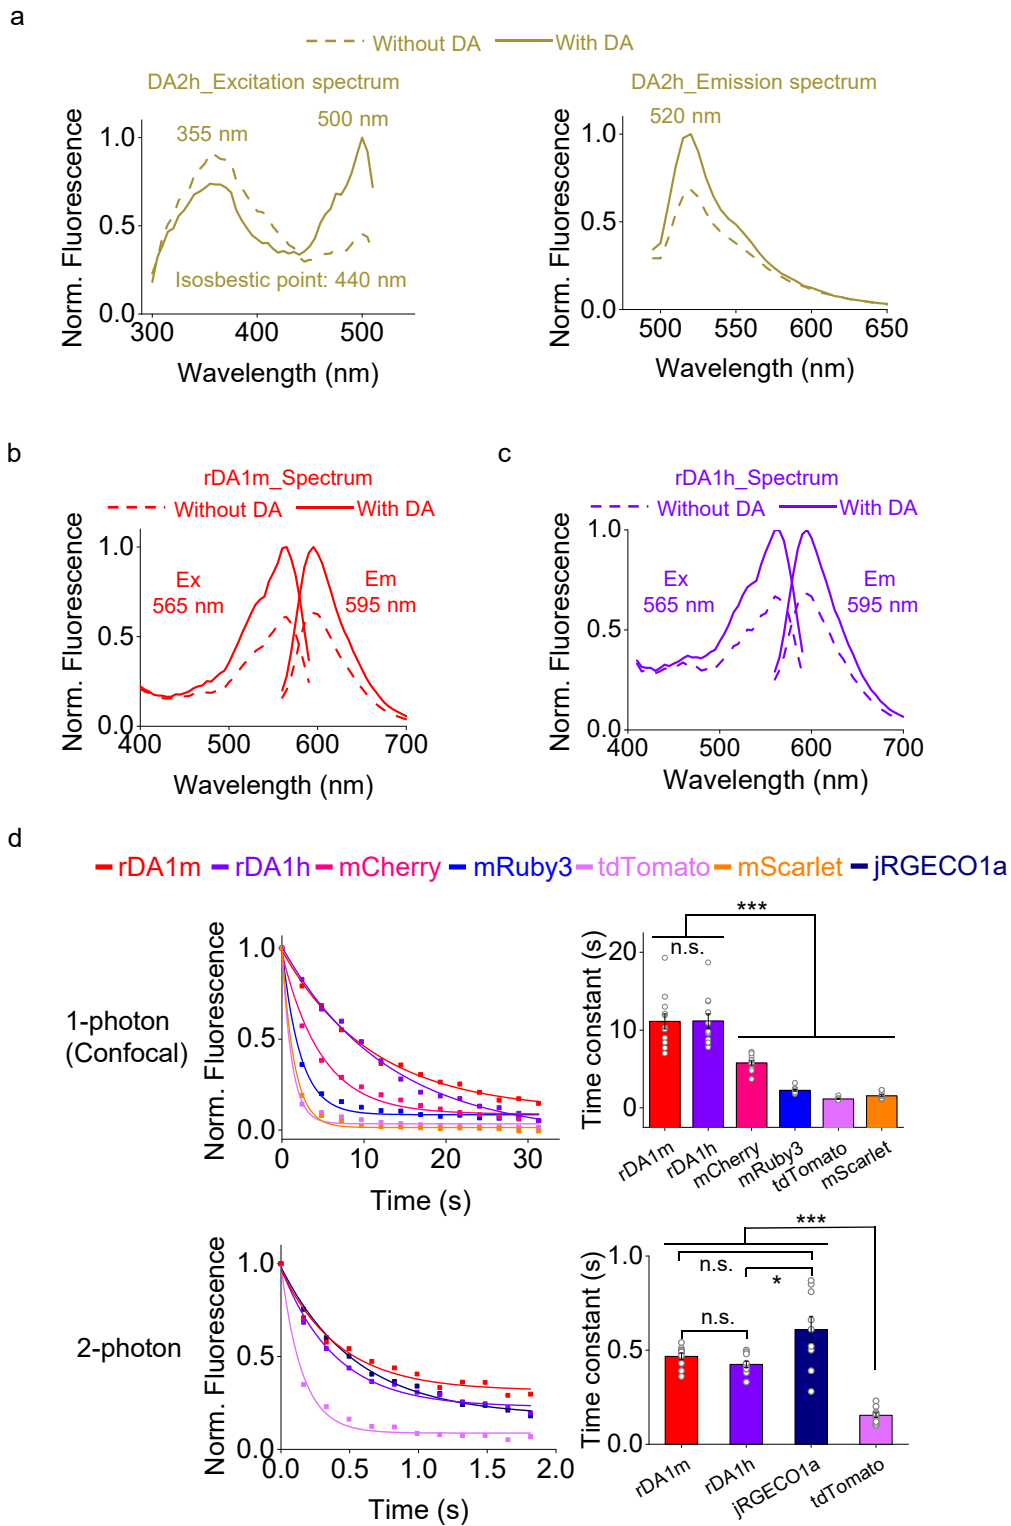

Supplementary Fig. S1 | Characterization of the sensors expressed in HEK293T cells (related to Fig. 2).

### Comparison of dLight and GRAB<sub>DA</sub> in HEK293T cells

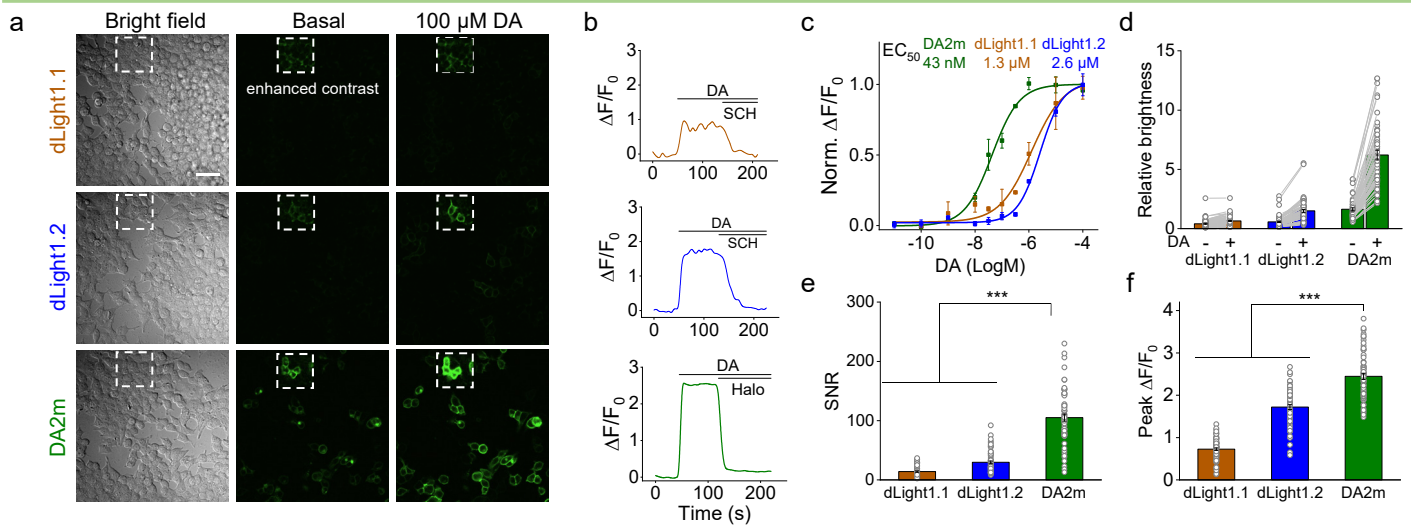

### Comparison of dLight and GRAB<sub>DA</sub> in cultured neurons

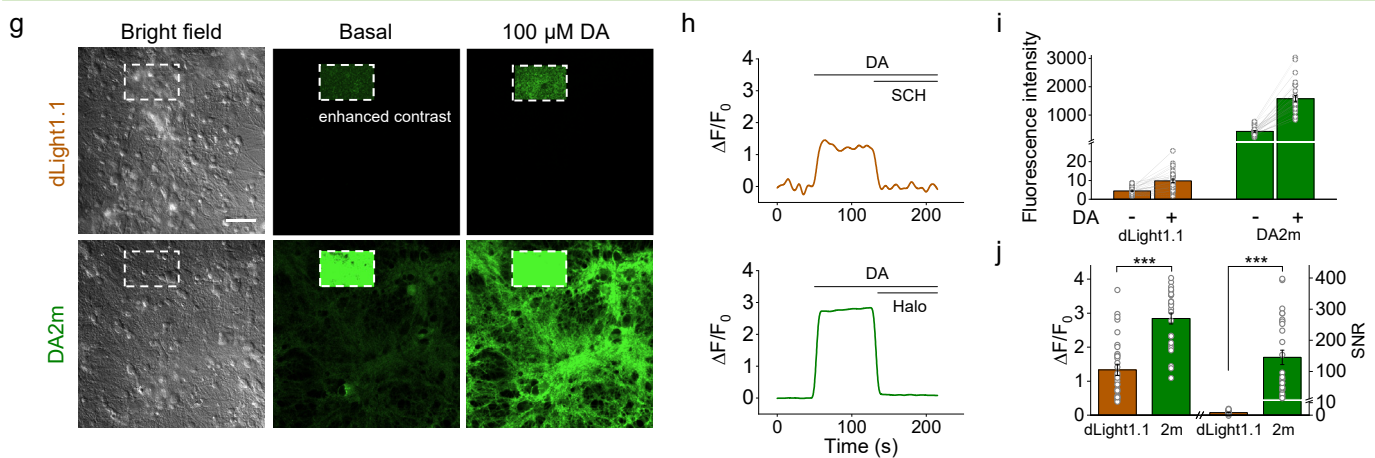

### Comparison of dLight1.3b and GRAB<sub>DA</sub> in *Drosophila*

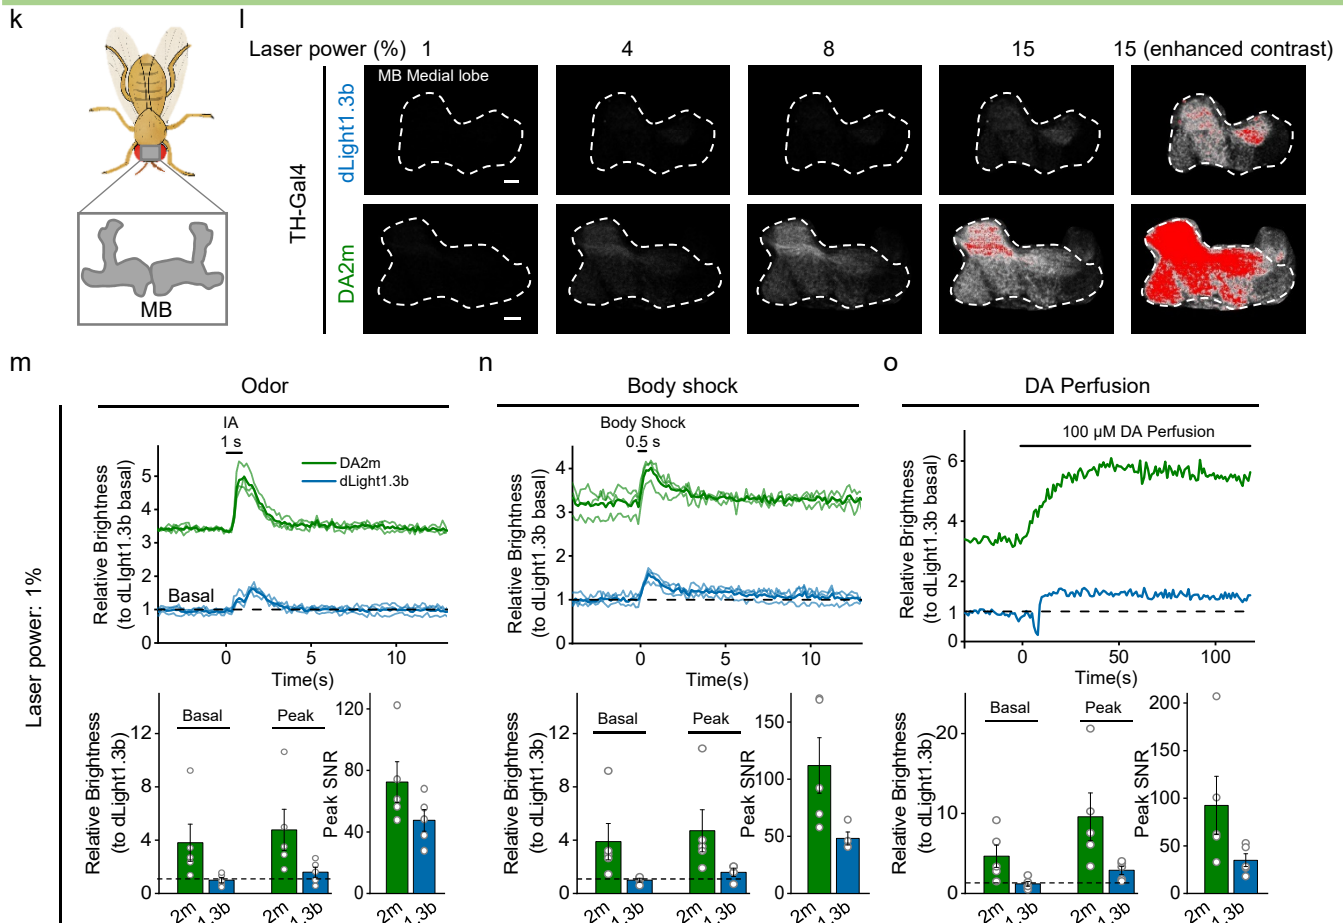

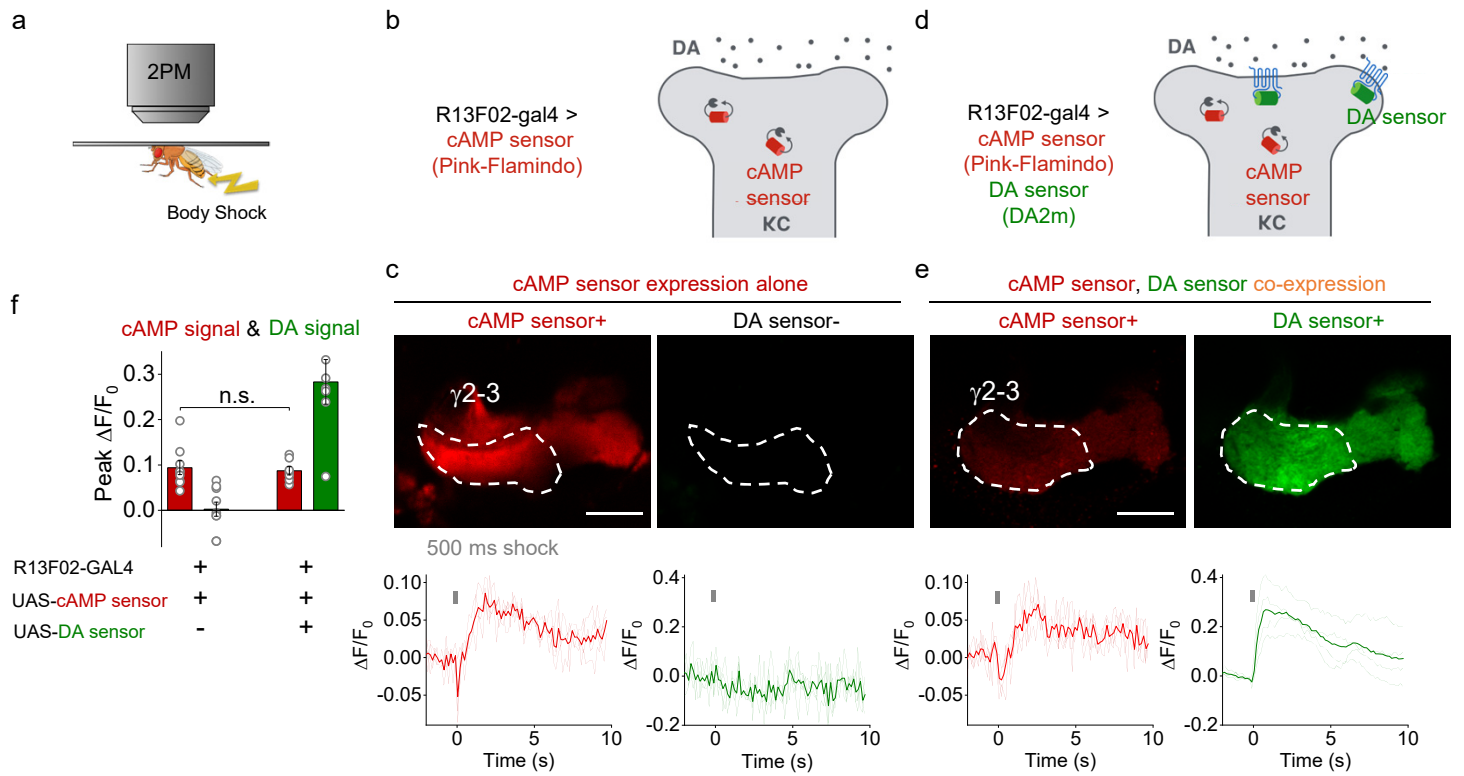

**Supplementary Fig. S3 | Expressing GRAB<sub>DA2m</sub> sensors does not affect cAMP signaling *in vivo* (related to Fig. 4).**



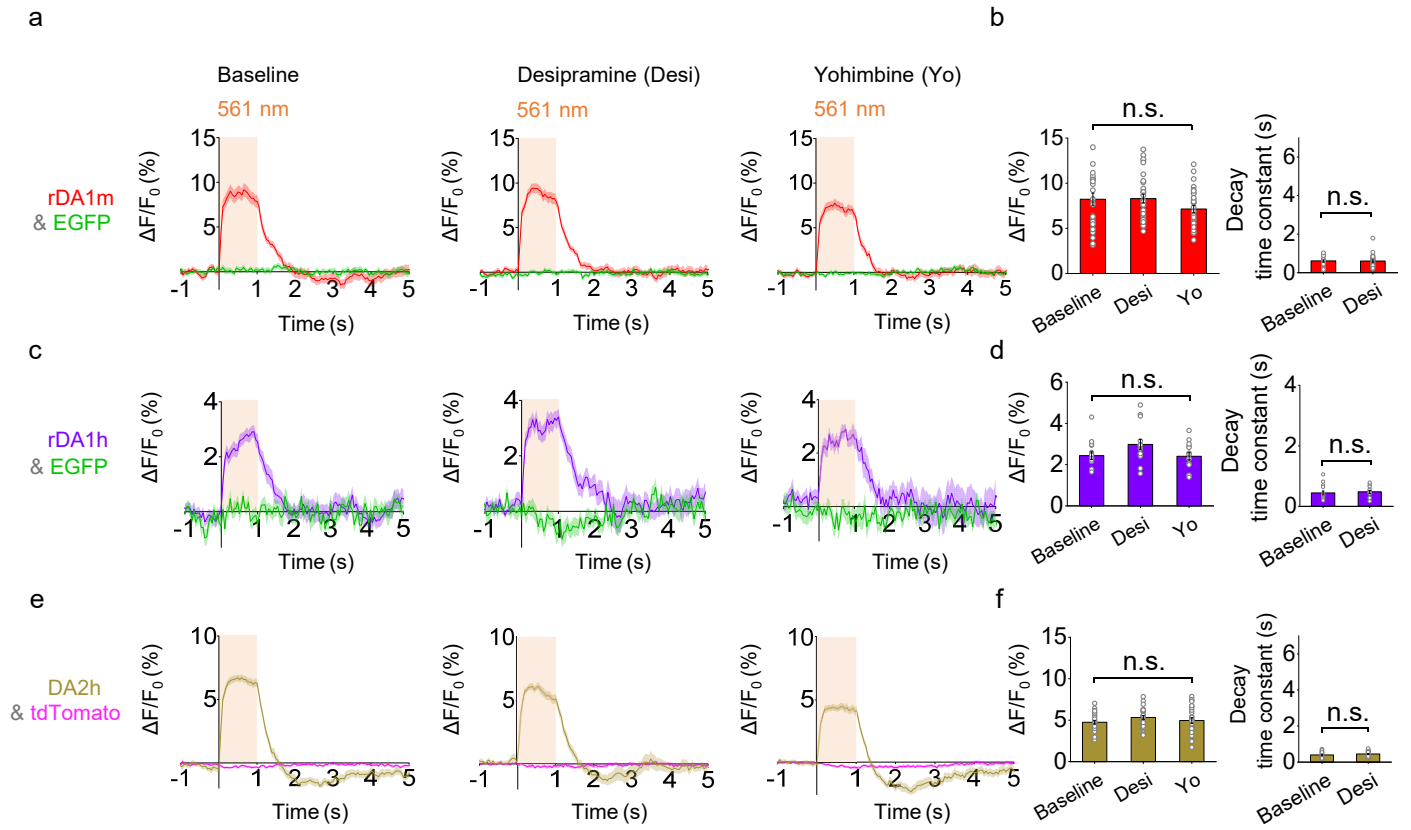

**Supplementary Fig. S4 | Optogenetically induced nigrostriatal DA release in freely moving mice is not affected by desipramine or yohimbine (related to Fig. 5).**



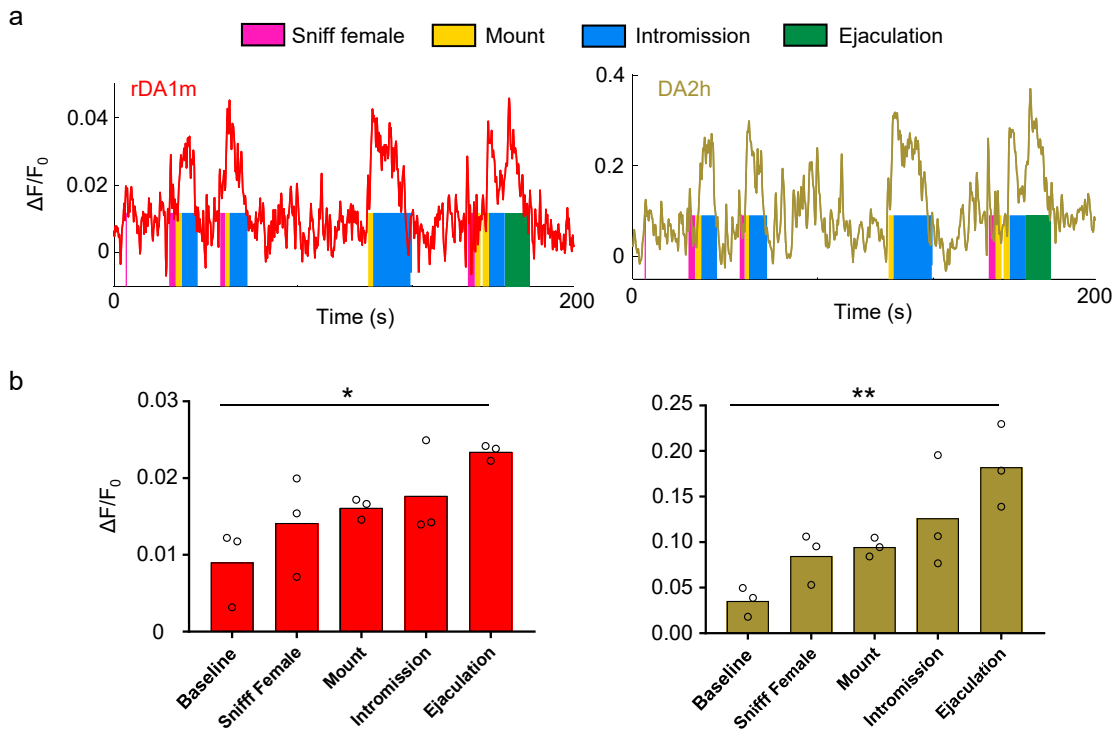

**Supplementary Fig. S5 | The  $\Delta F/F_0$  signals of rDA1m and DA2h during sexual behavior (related to Fig. 6).**

a

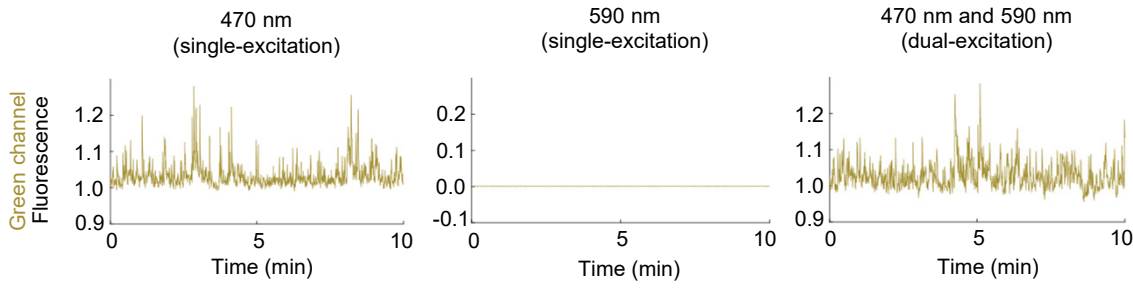

b

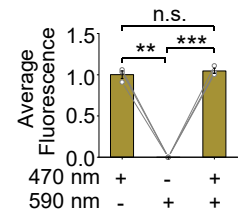

c

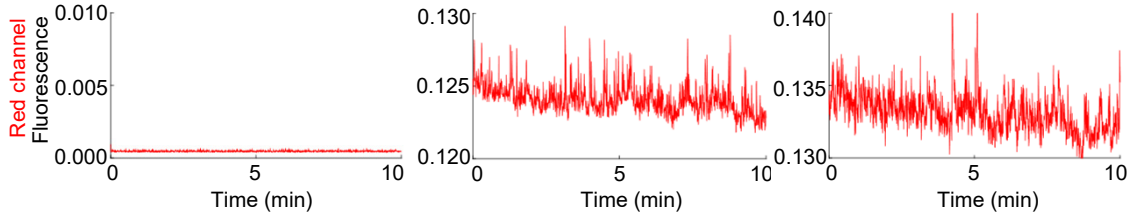

d

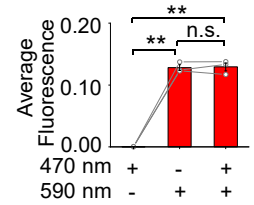

**Supplementary Fig. S6 | The excitation wavelength for DA2h does not excite rDA1m, and vice versa (related to Fig. 6).**

652 **Fig. 1 | Development and characterization of two novel red fluorescent DA sensors and**  
653 **second-generation green fluorescent DA sensors.**

654 **a,f**, Schematic illustration showing the design and optimization of the red and green fluorescent  
655 GRAB<sub>DA</sub> sensors.

656 **b**, Normalized change in fluorescence in response to 100  $\mu$ M DA measured for red fluorescent DA  
657 sensor variants during steps 1–3. A total of 2189 variants were screened, and the variant with the  
658 highest fluorescence change (named rDA0.5) was selected for subsequent affinity tuning; rDA0.5  
659 was then sequentially mutated as shown to generate rDA1m, rDA1h, and rDA-mut.

660 **c**, Representative red fluorescence images (top) and change in fluorescence in response to 100  $\mu$ M  
661 DA (bottom) in HEK293T cells expressing rDA1m, rDA1h or rDA-mut. Scale bars, 20  $\mu$ m.

662 **d**, Representative traces (left), group summary of peak  $\Delta F/F_0$  (middle;  $n=17-46$  cells), and  
663 normalized dose-response curves (right;  $n=3$  wells with 200–400 cells/well) in response to DA.  
664 Where indicated, 10  $\mu$ M haloperidol (Halo) was applied.

665 **e**, Representative traces (top) and group summary (bottom;  $n=8-9$  cells) of  $\Delta F/F_0$  in response to  
666 blue light in cells expressing jRGECO1a, rDA1m, or rDA1h.

667 **g**, Normalized  $\Delta F/F_0$  in response to 100  $\mu$ M DA application for 1056 variants, normalized to the  
668 first-generation DA1h sensor. DA2h was then mutated as shown to generate DA2m and DA-mut.

669 **h**, Representative green fluorescence images (top) and change in fluorescence in response to 100  
670  $\mu$ M DA (bottom) in HEK293T cells expressing DA1m, DA1h, DA2m, DA2h, or DA-mut. Scale  
671 bars, 20  $\mu$ m.

672 **i**, Representative traces (left), group summary of peak  $\Delta F/F_0$  (middle;  $n=33-68$  cells), and  
673 normalized dose-response curves (right;  $n=3$  wells with 200–500 cells/well) in response to DA.  
674 Where indicated, 10  $\mu$ M Halo was applied.

675

676 **Fig. 2 | Characterization of GRAB<sub>DA</sub> sensors in HEK293T cells and cultured neurons.**

677 **a**, Normalized  $\Delta F/F_0$  was measured in HEK293T cells expressing rDA1m, rDA1h, DA2m, or DA2h  
678 following the application of DA alone, DA+SCH-23390, DA+haloperidol, DA+eticlopride,  
679 serotonin (5-HT), histamine, glutamate, gamma-aminobutyric acid (GABA), adenosine,  
680 acetylcholine (ACh), octopamine, glycine, or L-DOPA (all applied at 1  $\mu$ M);  $n=3-4$  wells with 200–  
681 1200 cells/well. The insets show normalized dose-response curves for DA and norepinephrine (NE)  
682 in cells expressing rDA1m, rDA1h, DA2m, or DA2h ( $n=3$  wells with 200–800 cells/well).

683 **b-c**, Response kinetics for rDA1m, rDA1h, DA2m, and DA2h. **b1** and **c1**, Schematic illustration  
684 showing the local perfusion system for applying compounds. DA and Halo were delivered via a  
685 glass pipette (dashed gray lines) positioned at the sensor-expressing cells, and the fluorescence  
686 signal was measured using confocal line scanning (thick yellow lines). Scale bars, 10  $\mu$ m. **b2** and  
687 **c2**, Representative traces showing fluorescence after application of DA (left) and subsequent  
688 addition of Halo (right). The traces were the average of 3 different regions of interest (ROIs) on the  
689 scanning line, shaded with  $\pm$  s.e.m.. Each trace was fitted with a single-exponential function to  
690 determine  $\tau_{on}$  (left) and  $\tau_{off}$  (right). **b3** and **c3**, Group summary of  $\tau_{on}$  and  $\tau_{off}$  ( $n=7-10$  cells).

691 **d**, Gi coupling of wild-type (WT) D<sub>2</sub>R, rDA1h, and DA2h was measured using the luciferase  
692 complementation assay ( $n=3$  wells each).

693 **e**,  $\beta$ -arrestin coupling of WT D<sub>2</sub>R, rDA1h, and DA2h was measured using the TANGO assay ( $n=3$   
694 wells each).

695 **f,h**, Representative red (**f**) and green (**h**) fluorescence images (top) and response to 100  $\mu$ M DA

696 (bottom) in neurons expressing the indicated sensors. Scale bars, 10  $\mu\text{m}$ .

697 **g,i**, Dose-response curves (top) and group summary (bottom) of the responses measured in the soma  
698 and neurites of neurons expressing the indicated sensors ( $n=21-60$  neurons).

699

700 **Fig. 3 | GRAB<sub>DA</sub> sensors can be used to measure DA release in acute mouse brain slices.**

701 **a**, Schematic illustration depicting the experimental design for injecting AAVs expressing the  
702 rDA1m, rDA1h, or DA2m sensors in the mouse NAc, followed by imaging of electrical stimulation-  
703 evoked DA release in the NAc in acute brain slices.

704 **b**, Representative fluorescence images showing the expression of rDA1m, rDA1h, and DA2m in  
705 the NAc. The anterior cingulate area (aca) adjacent to the NAc is indicated. Scale bar, 100  $\mu\text{m}$ .

706 **c**, Fluorescence images measured in brain slices from mice expressing rDA1m, rDA1h, or DA2m  
707 in the NAc. The dashed circles indicate the ROIs used to analyze the signals.

708 **d**, Representative traces showing the normalized change in fluorescence (top) and group summary  
709 of  $\tau_{\text{on}}$  and  $\tau_{\text{off}}$  (bottom) for rDA1m, rDA1h, and DA2m in response to 10 electrical stimuli applied  
710 at 100 Hz ( $n=3-5$  slices from 2-3 mice). The data were processed with  $2\times$  binning.

711 **e**, Representative traces and group summary of the change in fluorescence measured for rDA1m  
712 (left), rDA1h (middle), and DA2m (right) in response to the indicated number of electrical stimuli  
713 applied at 20 Hz; where indicated, Halo (10  $\mu\text{M}$ ) was included in the bath solution ( $n=3-7$  slices  
714 from 2-4 mice).

715 **f**, Schematic illustration depicting the strategy for injecting AAVs in the NAc and VTA, followed  
716 by simultaneous recording of  $\text{Ca}^{2+}$  and DA release using dual-color imaging.

717 **g**, Representative green fluorescence (GCaMP6s), red fluorescence (rDA1m), and merged images  
718 of the NAc. The aca adjacent to the NAc is indicated. Scale bar, 100  $\mu\text{m}$ .

719 **h**, Fluorescence images showing the response of axon-GCaMP6s and rDA1m following 20  
720 electrical stimuli applied at 20 Hz. The dashed circles indicate the ROIs used to analyze the signals.

721 **i-j**, Representative traces (**i**) and group summary (**j**) of the change in axon-GCaMP6s and rDA1m  
722 fluorescence in response to 20 electrical stimuli applied at 20 Hz in the absence or presence of Halo  
723 (10  $\mu\text{M}$ );  $n=3$  slices from 3 mice.

724 **k**, The peak change in rDA1m fluorescence plotted against the peak change in axon-GCaMP6s  
725 fluorescence in response to various numbers of pulses applied at 20 Hz. The data were fitted to a  
726 linear function, and the coefficient of correlation is shown ( $n=8$  slices from 3 mice).

727 Average traces shaded with  $\pm$  s.e.m from one slice are shown for representation.

728

729 **Fig. 4 | In vivo 2-photon imaging of DA dynamics in *Drosophila* using GRAB<sub>DA</sub> sensors.**

730 **a**, Schematic illustration depicting the experimental setup for imaging fluorescence changes in  
731 *Drosophila* expressing GRAB<sub>DA</sub> sensors using 2-photon microscopy (2PM). Application of various  
732 stimuli are also depicted.

733 **b**, Representative red fluorescence images of a transgenic fly expressing rDA1m in the Kenyon cells  
734 (KCs), with an expanded view of the olfactory mushroom body (MB) medial lobe. Scale bars, 20  
735  $\mu\text{m}$  (top) and 10  $\mu\text{m}$  (bottom).

736 **c-e**, Representative images (top; the dashed area indicates the MB medial lobe), traces (middle), and  
737 group summary (bottom) of  $\Delta F/F_0$  in response to a 1 s application of odorant (**c**), a 500 ms body  
738 shock (**d**), and 100  $\mu\text{M}$  DA (**e**) in flies expressing rDA1m in saline, rDA1m in Halo, or rDA1m-mut  
739 in saline ( $n=5-15$  flies each).

740 **f**, Schematic illustration depicting the experimental setup for imaging electrical stimulation–evoked  
741 DA release.  
742 **g**, Representative green fluorescence images of a transgenic fly expressing DA2m in dopaminergic  
743 neurons (DANs), with an expanded view of the MB medial lobe. Scale bars, 20  $\mu\text{m}$  (left) and 10  
744  $\mu\text{m}$  (right).  
745 **h**, Representative traces of DA2m and DA1m fluorescence; where indicated, electrical stimuli were  
746 applied.  
747 **i,j**, Representative images (**i**, the dashed area indicates the MB medial lobe) and traces (**j**) of DA2m  
748  $\Delta F/F_0$  in response to electrical stimuli applied at 20 Hz in the absence or presence of Halo.  
749 **k**, Group summary of DA2m and DA1m  $\Delta F/F_0$  in response to electrical stimuli applied at 20 Hz in  
750 the absence or presence of Halo ( $n=9-10$  flies each).  
751 **l**, Kinetics ( $\tau_{\text{on}}$  and  $\tau_{\text{off}}$ ) of DA2m and DA1m in response to a single electrical stimulus ( $n=9-10$  flies  
752 each).  
753 **m-o**, Representative traces (left), fluorescence images (upper right), and group summary (bottom  
754 right) of the indicated MB lobe compartments in response to a 1 s application of odorant (**m**), a 500  
755 ms body shock (**n**), and 100  $\mu\text{M}$  DA (**o**);  $n=3-10$  flies each.  
756 **p**, Schematic illustration depicting the strategy for imaging optogenetically induced DA release.  
757 DA2m is expressed in the KCs, and CsChrimson is expressed in the DANs in either the  $\gamma 2$  or  $\gamma 5$   
758 MB compartment (with the number of innervating cells indicated).  
759 **q,r**, Representative fluorescence images of CsChrimson (upper left), DA2m (lower left),  
760 representative traces (top right), and group summary (bottom right) of DA2m fluorescence in the  $\gamma 2$   
761 (**q**) and  $\gamma 5$  (**r**) MB compartments in response to optogenetic stimulation ( $n=5-6$  flies each). Scale  
762 bars, 20  $\mu\text{m}$ .  
763 The group data for DA1m shown in panels **k**, **m**, **n**, and **o** were reproduced from Sun et al.<sup>31</sup> with  
764 permission. Average traces (bold), overlaid with single-trial traces (light) or shaded with  $\pm$  s.e.m,  
765 from one fly are shown for representation.  
766

767 **Fig. 5 | GRAB<sub>DA</sub> sensors can detect optogenetically induced nigrostriatal DA release in freely**  
768 **moving mice.**

769 **a**, Schematic illustration depicting the experimental setup for dual-color fiber photometry recording  
770 in the dorsal striatum while optogenetically stimulating DANs in the SNc. The combinations of  
771 sensor and fluorescent protein were used in the experiments shown in panels **c-l**.  
772 **b**, Measured emission spectra of rDA1m and EGFP (left) and DA2m and tdTomato (right).  
773 **c,e,g,i,k**, Average  $\Delta F/F_0$  traces of the indicated sensors and fluorescent proteins during optogenetic  
774 stimulation under control conditions (left) or in the presence of methylphenidate (MPH) or  
775 eticlopride (Etic).  
776 **d,f,h,j,l**, Group summary of  $\Delta F/F_0$  and  $\tau_{\text{off}}$  (where applicable) for the corresponding sensors in  
777 panels **c**, **e**, **g**, **i**, and **k**, respectively ( $n=15-30$  trials from 3–6 hemispheres of 3–4 mice per condition).  
778

779 **Fig. 6 | GRAB<sub>DA</sub> sensors can be used to measure dopaminergic activity in the mouse NAc**  
780 **during sexual behavior.**

781 **a**, Schematic illustration depicting the strategy for injecting AAVs and performing bilateral fiber  
782 photometry recording.  
783 **b**, Representative image showing the expression of DA1h and DA2h in opposite hemispheres, as

784 well as the recording site ('fiber tip'). The nuclei were counterstained with DAPI (blue). Scale bar,  
785 1 mm.

786 **c**, Representative traces of DA1h and DA2h  $\Delta F/F_0$  measured during the indicated stages of mating.

787 **d**, Summary of the time shift correlation coefficient between the DA1h and DA2h signals (n=3  
788 mice).

789 **e**, Average post-stimulus histograms showing the  $\Delta F/F_0$  signals of DA1h and DA2h aligned to the  
790 onset of the indicated mating events (n=3 mice).

791 **f**, Group summary of mean  $\Delta F/F_0$  measured for DA1h and DA2h during the indicated mating events  
792 (n=3 mice).

793 **g**, Schematic illustration depicting the strategy for injecting AAVs and performing dual-color fiber  
794 photometry recording.

795 **h**, Representative images showing the colocalized expression of rDA1m (red) and DA2h (green),  
796 as well as the recording site. The nuclei were counterstained with DAPI (blue). Scale bar, 1 mm.

797 **i**, Representative traces of the concurrent Z-score signals of rDA1m (left) and DA2h (right) during  
798 the indicated stages of sexual behavior.

799 **j**, Summary of the time shift correlation coefficient between the rDA1m and DA2h signals (n=3  
800 mice).

801 **k**, Average post-stimulus histograms showing the Z-score signals of rDA1m and DA2h aligned to  
802 the onset of the indicated mating events (n=3 mice).

803 **l**, Group summary of the mean Z-scores measured for rDA1m and DA2h during the indicated mating  
804 events (n=3 mice).

805

806 **Supplementary Fig. S1 | Characterization of the sensors expressed in HEK293T cells (related**  
807 **to Fig. 2).**

808 **a-c**, The excitation and emission spectra of DA2h (**a**), rDA1m (**b**), and rDA1h (**c**) in the absence  
809 and presence of DA.

810 **d**, The photostability of rDA1m and rDA1h (in the presence of 100  $\mu\text{M}$  DA) and the indicated  
811 fluorescent proteins was measured using 1-photon (top) and 2-photon (bottom) microscopy. Left,  
812 representative photobleaching curves; each curve was fitted to a single-exponential function. Right,  
813 group summary of the photobleaching time constants (n=10–12 cells each).

814

815 **Supplementary Fig. S2 | Comparison between dLight and GRAB<sub>DA</sub> (related to Figs. 2 and 4).**

816 **a**, Representative bright-field and fluorescence images measured before (baseline) and after  
817 application of DA in HEK293T cells expressing dLight1.1, dLight1.2, or DA2m. Scale bar, 50  $\mu\text{m}$ .

818 **b**, Representative traces of dLight1.1, dLight1.2, and DA2m  $\Delta F/F_0$  in response to 100  $\mu\text{M}$  DA  
819 followed by either 10  $\mu\text{M}$  SCH (dLight1.1 and dLight1.2) or 10  $\mu\text{M}$  Halo (DA2m).

820 **c**, Normalized dose-response curves for dLight1.1, dLight1.2, and DA2m (n=3 wells with 100–500  
821 cells/well).

822 **d-f**, Group summary of the relative brightness (**d**), signal-to-noise ratio (SNR) (**e**), and peak  $\Delta F/F_0$   
823 (**f**) for dLight1.1, dLight1.2, and DA2m in response to 100  $\mu\text{M}$  DA (n=35–77 cells each). To assess  
824 brightness, the membrane-targeted red fluorescent protein mCherry-CAAX was co-expressed with  
825 each sensor, and relative brightness was normalized to the corresponding mCherry signal.

826 **g-j**, Similar to **a-f**, except that dLight1.1 and DA2m were expressed in cultured neurons (n=28–30  
827 neurons each). Scale bar, 50  $\mu\text{m}$ .



828 **k**, Schematic illustration depicting the location of the *Drosophila* olfactory mushroom body (MB).  
829 **l**, Fluorescence images of the MB in flies expressing dLight1.3b (top) or DA2m (bottom) using 2-  
830 photon microscopy at the indicated laser power settings. Enhanced-contrast images at 15% laser  
831 power are shown at the right. Fluorescence is shown in grayscale, with saturated pixels shown in  
832 red. Scale bars, 10  $\mu\text{m}$ .

833 **m-o**, Representative traces (top) and group summary of relative brightness measured for dLight1.3b  
834 and DA2m during odorant application (**m**), body shock (**n**), and DA perfusion (**o**);  $n=4-5$  flies each.  
835 Average traces (bold) overlaid with single-trial traces (light) from one fly are shown for  
836 representation.

837

838 **Supplementary Fig. S3 | Expressing GRAB<sub>DA2m</sub> sensors does not affect cAMP signaling *in***  
839 ***vivo* (related to Fig. 4).**

840 **a**, Schematic illustration depicting the experimental setup for imaging body shock-evoked DA  
841 release using 2-photon microscopy.

842 **b-e**, Schematic illustrations depicting the experimental strategy (**b,d**) and representative  
843 fluorescence images and  $\Delta F/F_0$  traces (**c,e**) in flies expressing the cAMP sensor Pink-Flamindo (**b,c**)  
844 or co-expressing Pink-Flamindo and DA2m (**d,e**) in MB KCs. Where indicated, a 500 ms body  
845 shock was delivered. The ROIs for measuring the  $\gamma 2$ - $\gamma 3$  compartments in the MB are indicated by  
846 dashed white lines. Scale bars, 25  $\mu\text{m}$ . Average traces (bold) overlaid with single-trial traces (light)  
847 from one fly are shown for representation.

848 **f**, Group summary of peak Pink-Flamindo and DA2m  $\Delta F/F_0$  measured under the indicated  
849 conditions ( $n=7-9$  flies each).

850

851 **Supplementary Fig. S4 | Optogenetically induced nigrostriatal DA release in freely moving**  
852 **mice is not affected by desipramine or yohimbine (related to Fig. 5).**

853 **a,c,e**, Average traces of  $\Delta F/F_0$  in mice expressing rDA1m and EGFP (**a**), rDA1h and EGFP (**c**), or  
854 DA2h and tdTomato (**e**) in the dorsal striatum. Where indicated, the experiments were conducted in  
855 mice treated with either the norepinephrine transporter blocker desipramine or the  $\alpha_{2A}R$  antagonist  
856 yohimbine.

857 **b,d,f**, Group summary of  $\Delta F/F_0$  and  $\tau_{\text{off}}$  for the experiments shown in **a**, **c**, and **e**, respectively ( $n=25-$   
858  $30$  trials from 5–6 hemispheres of 3–6 mice each).

859

860 **Supplementary Fig. S5 | The  $\Delta F/F_0$  signals of rDA1m and DA2h during sexual behavior**  
861 **(related to Fig. 6).**

862 **a**, Representative traces of rDA1m and DA2h  $\Delta F/F_0$  measured during the indicated stages of mating.

863 **b**, Group summary of the  $\Delta F/F_0$  measured for rDA1m and DA2h during the indicated mating events  
864 ( $n=3$  mice).

865

866 **Supplementary Fig. S6 | The excitation wavelength for DA2h does not excite rDA1m, and**  
867 ***vice versa* (related to Fig. 6).**

868 Mice co-expressing DA2h and rDA1m in the NAc were used for these experiments. Delivery of 470  
869 nm light excited DA2h (green) but had no effect on rDA1m (red); conversely, delivery of 590 nm  
870 light excited rDA1m but had no effect on DA2h. Delivery of both 470 nm and 590 nm light using  
871 dual-wavelength excitation excited both DA2h and rDA1m. Shown at the right are the group

872 summaries (n=3 mice each).

873
